# Supplementary material
Source: publisher site journal article supplement (https://www.dovepress.com/get_supplementary_file.php?f=193808-TS3.xlsx)
Supplement: Supplementary file 1 [file get_supplementary_file.php]

## Sheet: TableS3
TableS3: GO terms on BP, CC, MF levels enriched of the DEGs between S1 and S2
GO_type	GO_term	Num_Genes	p_adjust	p_value
CC	immunoglobulin complex	33	1.76568e-44	7.95351e-47
CC	immunoglobulin complex, circulating	32	4.07351e-44	3.66983e-46
CC	blood microparticle	45	3.02827e-37	4.09226e-39
CC	extracellular matrix	53	2.41597e-25	4.35309e-27
CC	external side of plasma membrane	39	8.37712e-22	1.88674e-23
CC	proteinaceous extracellular matrix	43	4.21114e-21	1.13815e-22
CC	extracellular matrix component	18	1.07822e-10	3.3998e-12
CC	apical part of cell	29	4.80812e-10	1.73265e-11
CC	collagen trimer	15	9.41988e-10	3.81887e-11
CC	apical plasma membrane	22	4.61847e-07	2.13448e-08
CC	fibrillar collagen trimer	6	4.61847e-07	2.49647e-08
CC	banded collagen fibril	6	4.61847e-07	2.49647e-08
CC	complex of collagen trimers	7	5.58306e-07	3.26936e-08
CC	endoplasmic reticulum lumen	20	5.64049e-06	3.55706e-07
CC	brush border	11	1.92017e-05	1.29742e-06
CC	microfibril	4	0.000259143	1.86769e-05
CC	brush border membrane	7	0.00045299	3.46884e-05
CC	cluster of actin-based cell projections	11	0.000690996	5.60267e-05
CC	microvillus membrane	4	0.00748482	0.000656433
CC	microvillus	7	0.00748482	0.000674308
CC	lysosomal lumen	7	0.0158451	0.00149886
CC	actin-based cell projection	10	0.0279655	0.00277136
CC	basement membrane	6	0.0568172	0.00588646
CC	cell projection membrane	13	0.0604038	0.00653014
CC	receptor complex	14	0.0633005	0.00712844
CC	catenin complex	3	0.122295	0.0143228
CC	spanning component of membrane	2	0.127342	0.0154876
CC	interstitial matrix	2	0.143166	0.0183698
CC	integrin complex	3	0.143166	0.0187019
CC	protein complex involved in cell adhesion	3	0.175686	0.0237413
CC	clathrin-coated pit	4	0.222067	0.0310094
CC	vacuolar lumen	7	0.234887	0.0338575
CC	Golgi lumen	5	0.235928	0.0350703
CC	myosin complex	4	0.243132	0.0372364
CC	anchored component of plasma membrane	3	0.336944	0.0531218
CC	myosin filament	2	0.353208	0.0572769
CC	intrinsic component of external side of plasma membrane	2	0.365274	0.0620172
CC	anchored component of membrane	6	0.365274	0.0625244
CC	muscle myosin complex	2	0.467907	0.0821998
CC	contractile fiber part	7	0.483233	0.0870689
CC	sarcoplasmic reticulum	3	0.52509	0.0973385
CC	plasma membrane receptor complex	6	0.52509	0.0993413
CC	contractile fiber	7	0.571405	0.115465
CC	myosin II complex	2	0.571405	0.11553
CC	platelet alpha granule lumen	3	0.571405	0.115825
CC	sarcoplasm	3	0.621418	0.131483
CC	cell-cell adherens junction	4	0.621418	0.131561
CC	sarcomere	6	0.639433	0.138256
CC	dendrite membrane	2	0.658876	0.145428
CC	focal adhesion	10	0.671872	0.161717
CC	fascia adherens	1	0.671872	0.163736
CC	Schmidt-Lanterman incisure	1	0.671872	0.163736
CC	cell-substrate adherens junction	10	0.671872	0.167117
CC	basolateral plasma membrane	6	0.671872	0.170156
CC	cell-substrate junction	10	0.671872	0.176307
CC	peroxisomal matrix	2	0.671872	0.176691
CC	microbody lumen	2	0.671872	0.176691
CC	platelet dense tubular network	1	0.671872	0.17856
CC	beta-catenin-TCF complex	1	0.671872	0.17856
CC	extrinsic component of plasma membrane	5	0.682542	0.184471
CC	myofibril	6	0.705584	0.193877
CC	dendritic spine membrane	1	0.730939	0.207429
CC	compact myelin	1	0.730939	0.207429
CC	platelet alpha granule	3	0.742419	0.214031
CC	chloride channel complex	2	0.7579	0.221908
CC	I band	4	0.771042	0.229229
CC	cation-transporting ATPase complex	1	0.779602	0.235285
CC	axolemma	1	0.796496	0.248845
CC	invadopodium	1	0.796496	0.248845
CC	filopodium	3	0.796496	0.251563
CC	neuron projection membrane	2	0.796496	0.254735
CC	neuromuscular junction	2	0.819738	0.274493
CC	anchored component of external side of plasma membrane	1	0.819738	0.275251
CC	pore complex	1	0.819738	0.275251
CC	endocytic vesicle lumen	1	0.819738	0.288104
CC	GABA-A receptor complex	1	0.819738	0.288104
CC	membrane raft	7	0.819738	0.288925
CC	growth cone	4	0.819738	0.291393
CC	membrane microdomain	7	0.819738	0.291708
CC	pericentric heterochromatin	1	0.824224	0.30073
CC	GABA receptor complex	1	0.824224	0.30073
CC	site of polarized growth	4	0.829189	0.311308
CC	membrane region	7	0.829189	0.322701
CC	lamellipodium membrane	1	0.829189	0.325317
CC	leading edge membrane	4	0.829189	0.335364
CC	neuronal cell body membrane	1	0.829189	0.337285
CC	axonal growth cone	1	0.829189	0.337285
CC	cell body membrane	1	0.829189	0.337285
CC	ATPase dependent transmembrane transport complex	1	0.829189	0.337285
CC	endoplasmic reticulum-Golgi intermediate compartment membrane	2	0.829189	0.339893
CC	cell-cell contact zone	2	0.829189	0.339893
CC	nuclear euchromatin	1	0.842253	0.349042
CC	desmosome	1	0.860764	0.36059
CC	endoplasmic reticulum-Golgi intermediate compartment	3	0.879261	0.3723
CC	Z disc	3	0.885868	0.381923
CC	high-density lipoprotein particle	1	0.885868	0.383078
CC	caveola	2	0.923214	0.403386
CC	excitatory synapse	1	0.940873	0.41534
CC	striated muscle thin filament	1	0.954636	0.425716
CC	euchromatin	1	0.958135	0.435908
CC	myofilament	1	0.958135	0.435908
CC	smooth endoplasmic reticulum	1	0.970532	0.44592
CC	endosome lumen	1	0.982306	0.455755
CC	ruffle membrane	2	0.999788	0.475505
CC	filamentous actin	1	0.999788	0.484227
CC	microbody part	2	0.999788	0.48701
CC	peroxisomal part	2	0.999788	0.48701
CC	actin cytoskeleton	9	0.999788	0.496393
CC	sarcoplasmic reticulum membrane	1	0.999788	0.502378
CC	plasma lipoprotein particle	1	0.999788	0.502378
CC	lipoprotein particle	1	0.999788	0.502378
CC	clathrin-coated endocytic vesicle membrane	1	0.999788	0.519893
CC	protein-lipid complex	1	0.999788	0.519893
CC	plasma membrane raft	2	0.999788	0.520562
CC	cell-cell junction	8	0.999788	0.520568
CC	multivesicular body	1	0.999788	0.528418
CC	actin filament	2	0.999788	0.53678
CC	A band	1	0.999788	0.536792
CC	clathrin-coated vesicle membrane	2	0.999788	0.542102
CC	extrinsic component of membrane	5	0.999788	0.580518
CC	endocytic vesicle	5	0.999788	0.580518
CC	intercalated disc	1	0.999788	0.591406
CC	SNARE complex	1	0.999788	0.605795
CC	basal part of cell	1	0.999788	0.612799
CC	stress fiber	1	0.999788	0.619679
CC	contractile actin filament bundle	1	0.999788	0.619679
CC	peroxisomal membrane	1	0.999788	0.646002
CC	lateral plasma membrane	1	0.999788	0.646002
CC	microbody membrane	1	0.999788	0.646002
CC	lamellipodium	3	0.999788	0.646898
CC	exocytic vesicle	3	0.999788	0.657495
CC	actin filament bundle	1	0.999788	0.658474
CC	clathrin-coated endocytic vesicle	1	0.999788	0.658474
CC	histone deacetylase complex	1	0.999788	0.664545
CC	cytoplasmic microtubule	1	0.999788	0.664545
CC	sarcolemma	2	0.999788	0.66536
CC	main axon	1	0.999788	0.676366
CC	peroxisome	2	0.999788	0.677721
CC	microbody	2	0.999788	0.677721
CC	cell leading edge	6	0.999788	0.680654
CC	neuronal cell body	7	0.999788	0.684042
CC	actomyosin	1	0.999788	0.693323
CC	distal axon	4	0.999788	0.702249
CC	apical junction complex	2	0.999788	0.712583
CC	tethering complex	1	0.999788	0.714562
CC	Golgi stack	2	0.999788	0.727038
CC	heterochromatin	1	0.999788	0.729524
CC	inclusion body	1	0.999788	0.761463
CC	ciliary membrane	1	0.999788	0.781947
CC	myelin sheath	2	0.999788	0.787532
CC	ruffle	2	0.999788	0.790364
CC	rough endoplasmic reticulum	1	0.999788	0.800676
CC	coated vesicle membrane	2	0.999788	0.80403
CC	Golgi cisterna membrane	1	0.999788	0.804225
CC	autophagosome	1	0.999788	0.807711
CC	peptidase complex	1	0.999788	0.807711
CC	ATPase complex	1	0.999788	0.824234
CC	clathrin-coated vesicle	2	0.999788	0.824256
CC	oxidoreductase complex	1	0.999788	0.845015
CC	melanosome	1	0.999788	0.850489
CC	pigment granule	1	0.999788	0.850489
CC	cytoplasmic vesicle lumen	4	0.999788	0.852622
CC	vesicle lumen	4	0.999788	0.854198
CC	Golgi cisterna	1	0.999788	0.865781
CC	protein-DNA complex	2	0.999788	0.868718
CC	axon part	4	0.999788	0.874798
CC	perikaryon	1	0.999788	0.879514
CC	bicellular tight junction	1	0.999788	0.885845
CC	occluding junction	1	0.999788	0.891845
CC	centriole	1	0.999788	0.901154
CC	transport vesicle	4	0.999788	0.905384
CC	synaptic membrane	3	0.999788	0.922172
CC	secretory granule lumen	3	0.999788	0.926072
CC	transmembrane transporter complex	3	0.999788	0.926072
CC	transporter complex	3	0.999788	0.933342
CC	dendritic spine	1	0.999788	0.935852
CC	vacuolar membrane	4	0.999788	0.936331
CC	neuron spine	1	0.999788	0.938123
CC	RNA polymerase II transcription factor complex	1	0.999788	0.938123
CC	endocytic vesicle membrane	1	0.999788	0.942429
CC	transcription factor complex	3	0.999788	0.944502
CC	recycling endosome	1	0.999788	0.946436
CC	lysosomal membrane	3	0.999788	0.951386
CC	lytic vacuole membrane	3	0.999788	0.951386
CC	nuclear chromatin	3	0.999788	0.952029
CC	microtubule organizing center part	1	0.999788	0.954464
CC	coated vesicle	2	0.999788	0.956735
CC	cytoplasmic side of plasma membrane	1	0.999788	0.956864
CC	synaptic vesicle	1	0.999788	0.957635
CC	mitochondrial outer membrane	1	0.999788	0.959137
CC	nuclear transcription factor complex	1	0.999788	0.963989
CC	presynapse	3	0.999788	0.965742
CC	nuclear speck	3	0.999788	0.966205
CC	cytoplasmic ribonucleoprotein granule	1	0.999788	0.967687
CC	ion channel complex	2	0.999788	0.969009
CC	chromosome, centromeric region	1	0.999788	0.969392
CC	intermediate filament	1	0.999788	0.971007
CC	trans-Golgi network	1	0.999788	0.971526
CC	cytoplasmic side of membrane	1	0.999788	0.971526
CC	nuclear membrane	2	0.999788	0.972157
CC	ribonucleoprotein granule	1	0.999788	0.972537
CC	organelle outer membrane	1	0.999788	0.973029
CC	outer membrane	1	0.999788	0.973987
CC	early endosome	2	0.999788	0.982214
CC	postsynaptic density	1	0.999788	0.98284
CC	postsynaptic specialization	1	0.999788	0.98345
CC	asymmetric synapse	1	0.999788	0.984325
CC	neuron to neuron synapse	1	0.999788	0.985154
CC	intermediate filament cytoskeleton	1	0.999788	0.985682
CC	late endosome	1	0.999788	0.986191
CC	postsynaptic membrane	1	0.999788	0.987613
CC	mitochondrial matrix	3	0.999788	0.987654
CC	endosomal part	3	0.999788	0.993283
CC	microtubule	2	0.999788	0.994574
CC	cell cortex	1	0.999788	0.99509
CC	secretory granule membrane	1	0.999788	0.995676
CC	endosome membrane	2	0.999788	0.99725
CC	postsynapse	2	0.999788	0.99725
CC	nuclear envelope	2	0.999788	0.997465
CC	chromosomal region	1	0.999788	0.998094
CC	ciliary part	1	0.999788	0.999574
CC	cytoplasmic region	1	0.999788	0.999788
BP	complement activation, classical pathway	65	1.53457e-77	5.20194e-81
BP	humoral immune response mediated by circulating immunoglobulin	65	1.24639e-74	8.45009e-78
BP	complement activation	66	1.62008e-71	1.64754e-74
BP	protein activation cascade	68	5.14717e-70	6.97921e-73
BP	immunoglobulin mediated immune response	65	1.34735e-62	2.28365e-65
BP	B cell mediated immunity	65	1.66016e-62	3.3766e-65
BP	adaptive immune response based on somatic recombination of immune receptors built from immunoglobulin superfamily domains	70	1.68484e-54	3.99792e-57
BP	humoral immune response	70	6.23664e-53	1.69129e-55
BP	lymphocyte mediated immunity	67	1.53629e-50	4.68698e-53
BP	phagocytosis	65	1.12158e-46	3.80196e-49
BP	regulation of complement activation	43	5.52785e-45	2.06123e-47
BP	regulation of protein activation cascade	43	8.3419e-45	3.39331e-47
BP	regulation of humoral immune response	44	4.66953e-43	2.05776e-45
BP	immune response-activating cell surface receptor signaling pathway	67	3.01141e-40	1.42914e-42
BP	regulation of acute inflammatory response	44	1.67425e-39	8.51314e-42
BP	immune response-regulating cell surface receptor signaling pathway	67	2.54608e-38	1.38092e-40
BP	phagocytosis, recognition	31	5.99489e-37	3.45468e-39
BP	regulation of protein processing	44	7.64511e-37	4.66481e-39
BP	regulation of protein maturation	44	1.29179e-36	8.32e-39
BP	immune response-regulating cell surface receptor signaling pathway involved in phagocytosis	40	3.8128e-36	2.7142e-38
BP	Fc-gamma receptor signaling pathway involved in phagocytosis	40	3.8128e-36	2.7142e-38
BP	acute inflammatory response	47	1.21234e-35	9.04119e-38
BP	Fc-gamma receptor signaling pathway	40	1.35947e-35	1.05993e-37
BP	Fc receptor mediated stimulatory signaling pathway	40	1.81709e-35	1.47831e-37
BP	protein processing	51	6.12959e-31	5.19456e-33
BP	phagocytosis, engulfment	31	5.14958e-30	4.53862e-32
BP	receptor-mediated endocytosis	50	8.98947e-30	8.22765e-32
BP	B cell receptor signaling pathway	31	7.60633e-29	7.21957e-31
BP	plasma membrane invagination	31	1.54401e-28	1.51784e-30
BP	membrane invagination	31	2.36273e-27	2.47118e-29
BP	protein maturation	51	2.36273e-27	2.48287e-29
BP	positive regulation of B cell activation	31	9.42665e-26	1.02255e-27
BP	regulation of inflammatory response	50	1.13975e-25	1.27497e-27
BP	Fc-epsilon receptor signaling pathway	36	1.29724e-25	1.49512e-27
BP	leukocyte migration	53	1.82433e-25	2.16446e-27
BP	Fc receptor signaling pathway	40	7.56316e-25	9.22962e-27
BP	regulation of B cell activation	33	4.29313e-24	5.3846e-26
BP	regulation of immune effector process	47	6.57415e-23	8.4684e-25
BP	cell recognition	33	1.31133e-21	1.73362e-23
BP	extracellular matrix organization	39	1.47116e-18	1.9948e-20
BP	B cell activation	35	3.33598e-18	4.63644e-20
BP	positive regulation of lymphocyte activation	37	3.60211e-18	5.12842e-20
BP	defense response to bacterium	36	3.87186e-18	5.64373e-20
BP	positive regulation of cell activation	38	5.23673e-17	7.81072e-19
BP	antigen receptor-mediated signaling pathway	34	6.10545e-17	9.3134e-19
BP	positive regulation of leukocyte activation	37	1.39746e-16	2.17909e-18
BP	extracellular structure organization	39	2.34793e-16	3.74077e-18
BP	regulation of lymphocyte activation	39	2.54685e-14	4.14402e-16
BP	skeletal system development	34	1.17772e-09	1.95621e-11
BP	collagen fibril organization	11	1.94047e-08	3.28893e-10
BP	immunoglobulin production	17	6.33618e-08	1.09541e-09
BP	collagen metabolic process	15	1.95399e-07	3.44432e-09
BP	collagen catabolic process	11	1.91068e-06	3.43274e-08
BP	cell-substrate adhesion	22	3.80953e-06	6.97338e-08
BP	production of molecular mediator of immune response	18	6.12128e-06	1.14126e-07
BP	gastrulation	16	1.34384e-05	2.58267e-07
BP	ossification	23	1.34384e-05	2.59657e-07
BP	connective tissue development	18	1.7602e-05	3.46073e-07
BP	cartilage development	15	5.67236e-05	1.13447e-06
BP	regulation of cell-substrate adhesion	15	7.85049e-05	1.59671e-06
BP	formation of primary germ layer	12	0.000123554	2.55485e-06
BP	positive regulation of cell-substrate adhesion	11	0.000176691	3.7135e-06
BP	negative regulation of embryonic development	6	0.000205318	4.38475e-06
BP	positive regulation of cell migration	24	0.000271358	5.88709e-06
BP	skeletal system morphogenesis	15	0.000286372	6.30989e-06
BP	cell adhesion mediated by integrin	8	0.000309294	6.91979e-06
BP	positive regulation of cell motility	24	0.000449953	1.02603e-05
BP	transmembrane receptor protein serine/threonine kinase signaling pathway	19	0.000449953	1.03718e-05
BP	negative regulation of cellular response to growth factor stimulus	12	0.000592981	1.38697e-05
BP	cell-matrix adhesion	14	0.000946788	2.24662e-05
BP	glomerular filtration	5	0.000959149	2.30846e-05
BP	positive regulation of cell adhesion	20	0.00105034	2.57521e-05
BP	regulation of cellular response to growth factor stimulus	16	0.00105034	2.59915e-05
BP	renal filtration	5	0.00119006	2.98523e-05
BP	regulation of angiogenesis	18	0.0015444	3.92643e-05
BP	mesenchyme development	15	0.00241871	6.23126e-05
BP	urate metabolic process	4	0.00251306	6.5595e-05
BP	mesenchymal cell differentiation	13	0.00258899	6.94761e-05
BP	response to BMP	12	0.00258899	7.02098e-05
BP	cellular response to BMP stimulus	12	0.00258899	7.02098e-05
BP	regulation of cell adhesion mediated by integrin	6	0.00275579	7.56673e-05
BP	osteoblast differentiation	13	0.00287883	8.09131e-05
BP	neural crest cell differentiation	8	0.00287883	8.09975e-05
BP	regulation of vasculature development	18	0.00373437	0.000106335
BP	reproductive structure development	20	0.00393933	0.000114834
BP	positive regulation of phospholipid metabolic process	6	0.00393933	0.000114842
BP	reproductive system development	20	0.00427506	0.000126078
BP	artery development	8	0.00542465	0.00016182
BP	mesenchyme morphogenesis	6	0.00558889	0.000168614
BP	renal system development	15	0.00602555	0.00018383
BP	nephron development	10	0.00629027	0.000194039
BP	negative regulation of cellular component movement	16	0.0064151	0.000200064
BP	positive regulation of cell adhesion mediated by integrin	4	0.00654135	0.000206219
BP	negative regulation of cell motility	15	0.00698781	0.000222662
BP	retina homeostasis	7	0.00823526	0.000265203
BP	regulation of chemotaxis	12	0.00851026	0.000276944
BP	vascular endothelial growth factor signaling pathway	5	0.00886609	0.000291529
BP	negative regulation of locomotion	16	0.00948902	0.000315228
BP	negative regulation of Wnt signaling pathway	12	0.00980258	0.000332141
BP	kidney development	14	0.00980258	0.000332291
BP	mesoderm formation	7	0.00995574	0.000344232
BP	cardiac ventricle morphogenesis	7	0.00995574	0.000344232
BP	mesenchymal cell development	7	0.0107233	0.000374407
BP	mesodermal cell differentiation	5	0.0108775	0.000387164
BP	vitamin transport	5	0.0108775	0.000387164
BP	embryonic skeletal system development	9	0.0110194	0.00039595
BP	mesoderm morphogenesis	7	0.0112117	0.000406662
BP	positive regulation of angiogenesis	11	0.0120541	0.000441304
BP	endoderm formation	6	0.012328	0.000455511
BP	tissue homeostasis	12	0.0126273	0.000470849
BP	catechol-containing compound biosynthetic process	4	0.0129022	0.000489847
BP	catecholamine biosynthetic process	4	0.0129022	0.000489847
BP	positive regulation of fat cell differentiation	6	0.0143817	0.000553252
BP	morphogenesis of a branching epithelium	11	0.0143817	0.000555769
BP	regulation of collagen metabolic process	5	0.0146919	0.000572737
BP	regulation of non-canonical Wnt signaling pathway	4	0.0150105	0.000590243
BP	bone trabecula formation	3	0.016064	0.000637116
BP	urogenital system development	15	0.0165	0.000659998
BP	BMP signaling pathway	10	0.0165068	0.000669241
BP	sensory organ morphogenesis	13	0.0165068	0.000671464
BP	vitamin D metabolic process	4	0.017033	0.000704416
BP	glomerulus vasculature development	4	0.017033	0.000704416
BP	phenol-containing compound biosynthetic process	5	0.0174849	0.00072903
BP	regulation of transmembrane receptor protein serine/threonine kinase signaling pathway	12	0.0175774	0.000738845
BP	embryonic organ morphogenesis	14	0.0185759	0.000787115
BP	glomerulus development	6	0.0186608	0.000797038
BP	cellular response to transforming growth factor beta stimulus	12	0.0197253	0.000863605
BP	collagen-activated signaling pathway	3	0.0197253	0.000864352
BP	somite development	7	0.0197253	0.000867643
BP	glycosaminoglycan catabolic process	6	0.0197253	0.000869252
BP	collagen biosynthetic process	5	0.0206086	0.000915163
BP	cellular response to amino acid stimulus	6	0.0210616	0.000946405
BP	morphogenesis of a branching structure	11	0.0210616	0.000974124
BP	negative regulation of canonical Wnt signaling pathway	10	0.0210616	0.000974513
BP	cartilage development involved in endochondral bone morphogenesis	4	0.0210616	0.000978117
BP	renal system vasculature development	4	0.0210616	0.000978117
BP	kidney vasculature development	4	0.0210616	0.000978117
BP	response to transforming growth factor beta	12	0.0214939	0.00100548
BP	positive regulation of vasculature development	11	0.0224351	0.00105711
BP	regulation of BMP signaling pathway	7	0.0224599	0.00106589
BP	urate transport	3	0.0231863	0.00113711
BP	keratan sulfate catabolic process	3	0.0231863	0.00113711
BP	cartilage morphogenesis	3	0.0231863	0.00113711
BP	metanephros development	7	0.0231863	0.00113934
BP	trabecula formation	4	0.0231863	0.00113966
BP	somitogenesis	6	0.0244434	0.00120974
BP	negative regulation of cell migration	13	0.0262666	0.00130888
BP	heart morphogenesis	12	0.0262953	0.00134777
BP	sprouting angiogenesis	9	0.0262953	0.00135627
BP	regulation of fat cell differentiation	8	0.0262953	0.00135793
BP	appendage development	10	0.0262953	0.00138561
BP	limb development	10	0.0262953	0.00138561
BP	positive regulation of cell-matrix adhesion	5	0.0262953	0.00139053
BP	antibacterial humoral response	5	0.0262953	0.00139053
BP	endodermal cell differentiation	5	0.0262953	0.00139053
BP	coronary vasculature development	5	0.0262953	0.00139053
BP	artery morphogenesis	6	0.0265604	0.00141418
BP	sex differentiation	13	0.0265604	0.00144511
BP	platelet-derived growth factor receptor-beta signaling pathway	3	0.0265604	0.00145857
BP	bone trabecula morphogenesis	3	0.0265604	0.00145857
BP	cellular response to X-ray	3	0.0265604	0.00145857
BP	regulation of Wnt signaling pathway, planar cell polarity pathway	3	0.0265604	0.00145857
BP	cardiac ventricle development	8	0.0273699	0.00151231
BP	aminoglycan catabolic process	6	0.0274455	0.00152578
BP	appendage morphogenesis	9	0.0277002	0.00156228
BP	limb morphogenesis	9	0.0277002	0.00156228
BP	extracellular matrix disassembly	7	0.0277002	0.00156812
BP	neural crest cell development	6	0.0288672	0.00164396
BP	aorta development	5	0.0294439	0.00168679
BP	cellular response to vitamin	4	0.0301106	0.00173519
BP	cardiac chamber morphogenesis	8	0.0303511	0.00176962
BP	regulation of embryonic development	8	0.0303511	0.00176962
BP	regulation of respiratory burst	3	0.0312337	0.00183167
BP	response to cAMP	7	0.0318732	0.00187998
BP	regulation of organ morphogenesis	12	0.0321279	0.00190589
BP	positive regulation of phosphatidylinositol 3-kinase activity	4	0.0328998	0.00197399
BP	positive regulation of cell migration involved in sprouting angiogenesis	4	0.0328998	0.00197399
BP	carbohydrate derivative catabolic process	10	0.0332185	0.00200634
BP	sulfur compound catabolic process	5	0.0332185	0.00202689
BP	positive regulation of sprouting angiogenesis	5	0.0332185	0.00202689
BP	embryonic organ development	17	0.0341222	0.0020936
BP	stem cell development	6	0.0352626	0.00218747
BP	regulation of phospholipid metabolic process	6	0.0352626	0.00218747
BP	platelet-derived growth factor receptor signaling pathway	5	0.0354496	0.00221453
BP	cardiac chamber development	9	0.0354496	0.00223652
BP	bone mineralization	7	0.0354496	0.00223792
BP	convergent extension	3	0.0354496	0.00225916
BP	establishment of planar polarity involved in neural tube closure	3	0.0354496	0.00225916
BP	embryonic limb morphogenesis	8	0.0370682	0.00238744
BP	embryonic appendage morphogenesis	8	0.0370682	0.00238744
BP	cellular response to vascular endothelial growth factor stimulus	5	0.0372922	0.00241451
BP	mesonephros development	7	0.0380925	0.00250428
BP	regulation of cell-matrix adhesion	7	0.0380925	0.00250428
BP	positive regulation of chemotaxis	8	0.0380925	0.00250507
BP	male sex differentiation	9	0.0384583	0.00254216
BP	epithelial to mesenchymal transition involved in endocardial cushion formation	3	0.0408768	0.00274359
BP	retina vasculature development in camera-type eye	3	0.0408768	0.00274359
BP	regulation of vascular endothelial growth factor signaling pathway	3	0.0408768	0.00274359
BP	endothelial cell migration	11	0.0411766	0.00277768
BP	branching involved in blood vessel morphogenesis	4	0.0412568	0.00282504
BP	positive regulation of phospholipase C activity	4	0.0412568	0.00282504
BP	positive regulation of lipid kinase activity	4	0.0412568	0.00282504
BP	epithelial to mesenchymal transition	8	0.0415208	0.00288535
BP	biomineral tissue development	8	0.0415208	0.00288535
BP	regulation of smooth muscle cell proliferation	8	0.0415208	0.00288535
BP	endoderm development	6	0.0436124	0.00304547
BP	glycosaminoglycan biosynthetic process	7	0.0463999	0.00327708
BP	establishment of planar polarity of embryonic epithelium	3	0.0463999	0.00328732
BP	regulation of cellular response to vascular endothelial growth factor stimulus	3	0.0463999	0.00328732
BP	smooth muscle cell proliferation	8	0.0464865	0.00330921
BP	muscle cell proliferation	10	0.0475417	0.00340044
BP	male gonad development	8	0.0481566	0.00346074
BP	regulation of Wnt signaling pathway	14	0.0482178	0.00348787
BP	cell-cell adhesion mediated by cadherin	4	0.0482178	0.00351418
BP	regulation of phospholipase C activity	4	0.0482178	0.00351418
BP	positive regulation of osteoblast differentiation	5	0.0491562	0.00361576
BP	development of primary male sexual characteristics	8	0.0491562	0.0036176
BP	response to amino acid	7	0.0491562	0.00363256
BP	negative regulation of cell growth	9	0.0512807	0.00380694
BP	cell migration involved in heart development	3	0.0519588	0.00389251
BP	regulation of epithelial tube formation	3	0.0519588	0.00389251
BP	eye development	14	0.0527689	0.00397109
BP	regulation of osteoblast differentiation	7	0.0531349	0.00401664
BP	regulation of epithelial to mesenchymal transition	6	0.0544287	0.00413289
BP	sodium-independent organic anion transport	4	0.0565008	0.00430939
BP	renal system process	7	0.0575699	0.00443074
BP	aminoglycan biosynthetic process	7	0.0575699	0.00443074
BP	canonical Wnt signaling pathway	13	0.0575699	0.00444947
BP	mesodermal cell fate commitment	3	0.0582485	0.00456115
BP	positive regulation of glycoprotein biosynthetic process	3	0.0582485	0.00456115
BP	cell proliferation involved in kidney development	3	0.0582485	0.00456115
BP	muscle tissue development	15	0.0583641	0.00458999
BP	negative regulation of transmembrane receptor protein serine/threonine kinase signaling pathway	7	0.0588671	0.0046495
BP	negative regulation of growth	11	0.0605373	0.00480194
BP	epithelial cell proliferation	15	0.0647434	0.00515753
BP	bone morphogenesis	6	0.0648852	0.00519082
BP	inorganic anion transport	9	0.0686971	0.00551906
BP	gonad development	10	0.0723536	0.00583734
BP	endocardial cushion formation	3	0.0749294	0.00609595
BP	uterus development	3	0.0749294	0.00609595
BP	xenobiotic metabolic process	7	0.0751272	0.00613751
BP	ameboidal-type cell migration	15	0.080545	0.00660742
BP	embryonic skeletal system morphogenesis	6	0.0822725	0.00677702
BP	regulation of gastrulation	4	0.0823001	0.00680719
BP	non-canonical Wnt signaling pathway	8	0.0835266	0.00695524
BP	endochondral bone growth	3	0.0835266	0.00696527
BP	odontogenesis	7	0.0836338	0.00700256
BP	development of primary sexual characteristics	10	0.0837486	0.00704056
BP	segmentation	6	0.0844977	0.00713218
BP	regulation of canonical Wnt signaling pathway	11	0.0852707	0.00722633
BP	regulation of endothelial cell migration	9	0.0855015	0.00727488
BP	positive regulation of lipid metabolic process	7	0.0855743	0.00731007
BP	positive regulation of phosphatidylinositol 3-kinase signaling	5	0.0894235	0.0076692
BP	regionalization	13	0.0896845	0.00775975
BP	chondrocyte differentiation	6	0.0896845	0.00788257
BP	neurotransmitter biosynthetic process	6	0.0896845	0.00788257
BP	regulation of platelet-derived growth factor receptor signaling pathway	3	0.0896845	0.0079044
BP	regulation of osteoblast proliferation	3	0.0896845	0.0079044
BP	cellular biogenic amine biosynthetic process	3	0.0896845	0.0079044
BP	positive regulation of glycoprotein metabolic process	3	0.0896845	0.0079044
BP	fat-soluble vitamin metabolic process	4	0.0907303	0.00802732
BP	glycosaminoglycan metabolic process	8	0.0908606	0.00806965
BP	ureteric bud development	6	0.0928559	0.00827834
BP	regulation of phosphatidylinositol 3-kinase activity	4	0.0959931	0.00868777
BP	inner ear morphogenesis	6	0.0959931	0.00868819
BP	mesonephric epithelium development	6	0.0959931	0.00868819
BP	mesonephric tubule development	6	0.0959931	0.00868819
BP	amine biosynthetic process	3	0.0965744	0.00891455
BP	response to prostaglandin E	3	0.0965744	0.00891455
BP	positive regulation of focal adhesion assembly	3	0.0965744	0.00891455
BP	negative regulation of cartilage development	3	0.0965744	0.00891455
BP	bone growth	3	0.0965744	0.00891455
BP	regulation of epithelial cell proliferation	13	0.0965744	0.00893722
BP	phosphatidylinositol 3-kinase signaling	7	0.0968943	0.00899967
BP	drug transport	9	0.0980088	0.00913642
BP	Wnt signaling pathway	17	0.0988539	0.00932939
BP	blood coagulation	13	0.0988539	0.00935945
BP	mesoderm development	7	0.0988539	0.00936928
BP	cochlea development	4	0.0988539	0.00938275
BP	regulation of extrinsic apoptotic signaling pathway in absence of ligand	4	0.0988539	0.00938275
BP	cell-cell signaling by wnt	17	0.101649	0.00968249
BP	response to organophosphorus	7	0.101993	0.00974988
BP	coagulation	13	0.106381	0.0102507
BP	outflow tract morphogenesis	5	0.106381	0.0102775
BP	regulation of epithelial cell apoptotic process	5	0.106381	0.0102775
BP	hemostasis	13	0.108135	0.0104836
BP	positive regulation of receptor-mediated endocytosis	4	0.111822	0.0108789
BP	tissue migration	12	0.112511	0.0109842
BP	osteoblast proliferation	3	0.113443	0.0111521
BP	positive regulation of adherens junction organization	3	0.113443	0.0111521
BP	positive regulation of protein secretion	10	0.116639	0.0115058
BP	embryo implantation	4	0.116814	0.0116814
BP	body morphogenesis	4	0.116814	0.0116814
BP	positive regulation of phospholipase activity	4	0.116814	0.0116814
BP	trabecula morphogenesis	4	0.116814	0.0116814
BP	vitamin metabolic process	7	0.121502	0.0122744
BP	fibrinolysis	3	0.121502	0.0123812
BP	anterior/posterior pattern specification	9	0.121502	0.0123947
BP	regulation of cell growth	14	0.121502	0.0124582
BP	regulation of sprouting angiogenesis	6	0.121502	0.0125051
BP	negative regulation of BMP signaling pathway	4	0.121502	0.0125209
BP	digestive tract morphogenesis	4	0.121502	0.0125209
BP	endochondral bone morphogenesis	4	0.121502	0.0125209
BP	replacement bone morphogenesis	4	0.121502	0.0125209
BP	neurotransmitter metabolic process	7	0.121591	0.012737
BP	nephron morphogenesis	5	0.121591	0.0127586
BP	aminoglycan metabolic process	8	0.121591	0.0130425
BP	positive regulation of endothelial cell migration	6	0.121591	0.0130533
BP	fat cell differentiation	9	0.121591	0.0131387
BP	luteinization	2	0.121591	0.0132934
BP	establishment of T cell polarity	2	0.121591	0.0132934
BP	negative regulation of cell adhesion mediated by integrin	2	0.121591	0.0132934
BP	paraxial mesoderm morphogenesis	2	0.121591	0.0132934
BP	vagina development	2	0.121591	0.0132934
BP	cell proliferation involved in metanephros development	2	0.121591	0.0132934
BP	dendritic cell apoptotic process	2	0.121591	0.0132934
BP	regulation of dopaminergic neuron differentiation	2	0.121591	0.0132934
BP	regulation of T-helper 2 cell cytokine production	2	0.121591	0.0132934
BP	regulation of platelet-derived growth factor receptor-beta signaling pathway	2	0.121591	0.0132934
BP	regulation of dendritic cell apoptotic process	2	0.121591	0.0132934
BP	negative regulation of blood coagulation	4	0.121591	0.0133981
BP	T-helper cell differentiation	4	0.121591	0.0133981
BP	negative regulation of hemostasis	4	0.121591	0.0133981
BP	drug transmembrane transport	5	0.121591	0.0134368
BP	regulation of blood coagulation	5	0.121591	0.0134368
BP	regulation of hemostasis	5	0.121591	0.0134368
BP	negative regulation of epithelial to mesenchymal transition	3	0.123213	0.0136849
BP	kidney epithelium development	7	0.123213	0.0136996
BP	cellular response to xenobiotic stimulus	8	0.124664	0.0139032
BP	release of sequestered calcium ion into cytosol	6	0.126173	0.0141998
BP	negative regulation of sequestering of calcium ion	6	0.126173	0.0141998
BP	nephron epithelium development	6	0.126173	0.0141998
BP	regulation of cytosolic calcium ion concentration	12	0.128107	0.0144609
BP	cellular response to fibroblast growth factor stimulus	7	0.129952	0.0147132
BP	regulation of sequestering of calcium ion	6	0.130316	0.0147986
BP	chemokine-mediated signaling pathway	5	0.130514	0.0148653
BP	endocardial cushion morphogenesis	3	0.130547	0.0150637
BP	keratan sulfate biosynthetic process	3	0.130547	0.0150637
BP	negative regulation of intrinsic apoptotic signaling pathway in response to DNA damage	3	0.130547	0.0150637
BP	positive regulation of epithelial cell apoptotic process	3	0.130547	0.0150637
BP	negative regulation of epithelial cell proliferation	7	0.130547	0.0152396
BP	CD4-positive, alpha-beta T cell differentiation involved in immune response	4	0.130547	0.0152673
BP	catecholamine metabolic process	4	0.130547	0.0152673
BP	catechol-containing compound metabolic process	4	0.130547	0.0152673
BP	regulation of lipid kinase activity	4	0.130547	0.0152673
BP	regulation of leukocyte chemotaxis	6	0.131426	0.0154147
BP	regulation of cell junction assembly	5	0.13276	0.0156162
BP	eye morphogenesis	7	0.133582	0.0157793
BP	establishment of lymphocyte polarity	2	0.133582	0.0160554
BP	cyclooxygenase pathway	2	0.133582	0.0160554
BP	positive regulation of osteoblast proliferation	2	0.133582	0.0160554
BP	vitamin D biosynthetic process	2	0.133582	0.0160554
BP	positive regulation of immunoglobulin secretion	2	0.133582	0.0160554
BP	anatomical structure regression	2	0.133582	0.0160554
BP	response to acid chemical	12	0.133582	0.0161346
BP	transforming growth factor beta receptor signaling pathway	8	0.133582	0.0162357
BP	alpha-beta T cell activation involved in immune response	4	0.133582	0.0162604
BP	alpha-beta T cell differentiation involved in immune response	4	0.133582	0.0162604
BP	negative regulation of coagulation	4	0.133582	0.0162604
BP	positive regulation of ossification	5	0.133582	0.0163921
BP	positive regulation of smooth muscle cell proliferation	5	0.133582	0.0163921
BP	regulation of coagulation	5	0.133582	0.0163921
BP	positive regulation of interleukin-1 secretion	3	0.133869	0.0165181
BP	face morphogenesis	3	0.133869	0.0165181
BP	sequestering of calcium ion	6	0.134879	0.0166998
BP	regulation of morphogenesis of an epithelium	8	0.134879	0.0167341
BP	regulation of endothelial cell proliferation	7	0.135837	0.0168991
BP	striated muscle tissue development	13	0.138988	0.0174127
BP	cell fate commitment	10	0.138988	0.0174131
BP	positive regulation of cytosolic calcium ion concentration	11	0.138988	0.0174682
BP	response to purine-containing compound	7	0.138988	0.0174796
BP	regulation of ossification	8	0.140493	0.017764
BP	inner ear development	8	0.140493	0.017764
BP	response to prostaglandin	3	0.140854	0.0180485
BP	positive regulation of smoothened signaling pathway	3	0.140854	0.0180485
BP	cardiac epithelial to mesenchymal transition	3	0.140854	0.0180485
BP	positive regulation of cell junction assembly	3	0.140854	0.0180485
BP	apoptotic process involved in development	3	0.140854	0.0180485
BP	negative regulation of cell-substrate adhesion	4	0.14219	0.0183659
BP	organic hydroxy compound metabolic process	16	0.14219	0.0186265
BP	response to fibroblast growth factor	7	0.14219	0.0186824
BP	female sex differentiation	6	0.14219	0.0187631
BP	positive regulation of cytokine secretion	6	0.14219	0.0187631
BP	post-embryonic animal morphogenesis	2	0.14219	0.019039
BP	gastro-intestinal system smooth muscle contraction	2	0.14219	0.019039
BP	cGMP-mediated signaling	2	0.14219	0.019039
BP	regulation of vitamin metabolic process	2	0.14219	0.019039
BP	high-density lipoprotein particle clearance	2	0.14219	0.019039
BP	dopamine biosynthetic process	2	0.14219	0.019039
BP	trophoblast giant cell differentiation	2	0.14219	0.019039
BP	negative regulation of androgen receptor signaling pathway	2	0.14219	0.019039
BP	nephric duct morphogenesis	2	0.14219	0.019039
BP	positive regulation of execution phase of apoptosis	2	0.14219	0.019039
BP	positive regulation of non-canonical Wnt signaling pathway	2	0.14219	0.019039
BP	positive regulation of extrinsic apoptotic signaling pathway in absence of ligand	2	0.14219	0.019039
BP	multicellular organismal homeostasis	12	0.142374	0.0191119
BP	regulation of body fluid levels	16	0.143091	0.0192606
BP	placenta development	7	0.143091	0.0193051
BP	ear morphogenesis	6	0.144083	0.0194879
BP	positive regulation of peptide secretion	10	0.144235	0.019652
BP	respiratory burst	3	0.144235	0.0196551
BP	regulation of blood vessel endothelial cell proliferation involved in sprouting angiogenesis	3	0.144235	0.0196551
BP	bone development	8	0.149715	0.0205366
BP	regulation of phospholipase activity	4	0.149715	0.0206332
BP	lymphocyte chemotaxis	4	0.149715	0.0206332
BP	positive regulation of leukocyte chemotaxis	5	0.149715	0.0206556
BP	roof of mouth development	5	0.149715	0.0206556
BP	branching morphogenesis of an epithelial tube	7	0.153157	0.0212603
BP	epithelial cell migration	11	0.153157	0.0213205
BP	negative regulation of JNK cascade	3	0.153157	0.0213381
BP	extracellular matrix assembly	3	0.153157	0.0213381
BP	positive regulation of protein kinase B signaling	7	0.15507	0.0219414
BP	immunological synapse formation	2	0.15507	0.0222354
BP	glycine metabolic process	2	0.15507	0.0222354
BP	regulation of microvillus organization	2	0.15507	0.0222354
BP	regulation of cell projection size	2	0.15507	0.0222354
BP	T-helper 2 cell cytokine production	2	0.15507	0.0222354
BP	norepinephrine metabolic process	2	0.15507	0.0222354
BP	protein heterotrimerization	2	0.15507	0.0222354
BP	planar cell polarity pathway involved in neural tube closure	2	0.15507	0.0222354
BP	negative regulation of substrate adhesion-dependent cell spreading	2	0.15507	0.0222354
BP	primary amino compound metabolic process	2	0.15507	0.0222354
BP	negative regulation of stem cell proliferation	2	0.15507	0.0222354
BP	pattern specification process	14	0.156127	0.0224474
BP	negative regulation of cell morphogenesis involved in differentiation	5	0.156127	0.0225458
BP	response to vitamin	5	0.156127	0.0225458
BP	regulation of extrinsic apoptotic signaling pathway	7	0.156396	0.0226376
BP	epithelium migration	11	0.156694	0.0227339
BP	T cell differentiation involved in immune response	4	0.157362	0.0230652
BP	monocyte chemotaxis	4	0.157362	0.0230652
BP	regulation of collagen biosynthetic process	3	0.157362	0.0230976
BP	keratan sulfate metabolic process	3	0.157362	0.0230976
BP	regulation of calcium ion import	3	0.157362	0.0230976
BP	phosphatidylinositol-mediated signaling	7	0.163213	0.0240755
BP	stem cell differentiation	10	0.163213	0.024203
BP	cell chemotaxis	10	0.163213	0.024203
BP	cell growth	15	0.163213	0.02423
BP	positive regulation of leukocyte migration	6	0.163213	0.0242393
BP	muscle contraction	12	0.163213	0.0243242
BP	cellular response to nutrient	4	0.163213	0.0243437
BP	response to X-ray	3	0.163874	0.0249335
BP	amyloid-beta metabolic process	3	0.163874	0.0249335
BP	cell fate commitment involved in formation of primary germ layer	3	0.163874	0.0249335
BP	regulation of neutrophil chemotaxis	3	0.163874	0.0249335
BP	muscle organ development	13	0.163874	0.0254678
BP	kidney morphogenesis	5	0.163874	0.0255855
BP	nephron tubule development	5	0.163874	0.0255855
BP	lymphocyte migration	5	0.163874	0.0255855
BP	neutrophil homeostasis	2	0.163874	0.0256361
BP	positive regulation of T cell cytokine production	2	0.163874	0.0256361
BP	complement activation, alternative pathway	2	0.163874	0.0256361
BP	mesodermal cell fate specification	2	0.163874	0.0256361
BP	oligosaccharide catabolic process	2	0.163874	0.0256361
BP	genitalia morphogenesis	2	0.163874	0.0256361
BP	fat-soluble vitamin biosynthetic process	2	0.163874	0.0256361
BP	negative regulation of JUN kinase activity	2	0.163874	0.0256361
BP	negative regulation of DNA damage response, signal transduction by p53 class mediator	2	0.163874	0.0256361
BP	negative regulation of bone remodeling	2	0.163874	0.0256361
BP	regulation of fibrinolysis	2	0.163874	0.0256361
BP	glomerular mesangium development	2	0.163874	0.0256361
BP	regulation of establishment of planar polarity involved in neural tube closure	2	0.163874	0.0256361
BP	positive regulation of lipase activity	4	0.163874	0.0256643
BP	calcium ion transmembrane import into cytosol	6	0.165538	0.0259811
BP	endothelial cell proliferation	7	0.167156	0.0263483
BP	inositol lipid-mediated signaling	7	0.167156	0.0263483
BP	response to vitamin D	3	0.16922	0.0268458
BP	head morphogenesis	3	0.16922	0.0268458
BP	response to interleukin-6	3	0.16922	0.0268458
BP	CD4-positive, alpha-beta T cell differentiation	4	0.169639	0.0270272
BP	regulation of cartilage development	4	0.169639	0.0270272
BP	cellular response to acid chemical	8	0.173443	0.0276931
BP	renal tubule development	5	0.173443	0.0277509
BP	ureteric bud morphogenesis	4	0.176713	0.0284327
BP	regulation of cell migration involved in sprouting angiogenesis	4	0.176713	0.0284327
BP	epithelial tube morphogenesis	11	0.176713	0.0285064
BP	regulation of wound healing	6	0.176713	0.0287466
BP	type 2 immune response	3	0.176713	0.0288343
BP	regulation of intrinsic apoptotic signaling pathway in response to DNA damage	3	0.176713	0.0288343
BP	phenol-containing compound metabolic process	5	0.176713	0.0288759
BP	positive regulation of type 2 immune response	2	0.176713	0.0292325
BP	growth plate cartilage development	2	0.176713	0.0292325
BP	regulation of extracellular matrix disassembly	2	0.176713	0.0292325
BP	NAD biosynthesis via nicotinamide riboside salvage pathway	2	0.176713	0.0292325
BP	chondrocyte proliferation	2	0.176713	0.0292325
BP	post-embryonic animal organ development	2	0.176713	0.0292325
BP	hepatocyte differentiation	2	0.176713	0.0292325
BP	nephric duct development	2	0.176713	0.0292325
BP	positive regulation of blood vessel endothelial cell proliferation involved in sprouting angiogenesis	2	0.176713	0.0292325
BP	adherens junction organization	6	0.179231	0.0297099
BP	mesonephric tubule morphogenesis	4	0.179895	0.0298809
BP	epithelial cell apoptotic process	5	0.180421	0.0300294
BP	organic hydroxy compound biosynthetic process	9	0.183773	0.0307168
BP	blood vessel endothelial cell proliferation involved in sprouting angiogenesis	3	0.183773	0.0308988
BP	regulation of glycoprotein biosynthetic process	3	0.183773	0.0308988
BP	dopamine metabolic process	3	0.183773	0.0308988
BP	regulation of neutrophil migration	3	0.183773	0.0308988
BP	positive regulation of endothelial cell proliferation	5	0.184517	0.0312115
BP	integrin-mediated signaling pathway	5	0.184517	0.0312115
BP	diterpenoid metabolic process	5	0.184517	0.0312115
BP	ventricular septum development	4	0.185094	0.0313719
BP	positive regulation of endocytosis	6	0.186281	0.0316994
BP	digestive tract development	6	0.186281	0.0316994
BP	cellular response to ionizing radiation	4	0.19186	0.0329061
BP	coronary vasculature morphogenesis	2	0.19186	0.0330167
BP	regulation of phospholipid biosynthetic process	2	0.19186	0.0330167
BP	metanephric glomerulus development	2	0.19186	0.0330167
BP	semi-lunar valve development	2	0.19186	0.0330167
BP	endocardial cushion development	3	0.19186	0.0330389
BP	cardiac septum development	5	0.195096	0.0336623
BP	positive regulation of Wnt signaling pathway	7	0.196825	0.0340334
BP	cellular response to tumor necrosis factor	10	0.196825	0.0340941
BP	myofibril assembly	4	0.198684	0.0344834
BP	regulation of phosphatidylinositol 3-kinase signaling	5	0.200872	0.0349313
BP	serine family amino acid metabolic process	3	0.201941	0.0352542
BP	keratinocyte proliferation	3	0.201941	0.0352542
BP	ear development	8	0.20328	0.0355568
BP	regulation of epithelial cell migration	9	0.204898	0.0359092
BP	positive regulation of blood vessel endothelial cell migration	4	0.205611	0.036104
BP	cellular divalent inorganic cation homeostasis	14	0.207401	0.0369311
BP	regulation of antigen processing and presentation	2	0.207401	0.0369806
BP	dorsal/ventral axis specification	2	0.207401	0.0369806
BP	negative regulation of platelet-derived growth factor receptor signaling pathway	2	0.207401	0.0369806
BP	T-helper 1 cell differentiation	2	0.207401	0.0369806
BP	regulation of immunoglobulin secretion	2	0.207401	0.0369806
BP	positive regulation of calcium ion import	2	0.207401	0.0369806
BP	midbrain dopaminergic neuron differentiation	2	0.207401	0.0369806
BP	response to oxygen levels	12	0.207788	0.0371201
BP	forelimb morphogenesis	3	0.209765	0.0375443
BP	signal transduction in absence of ligand	4	0.209821	0.0377679
BP	negative regulation of wound healing	4	0.209821	0.0377679
BP	extrinsic apoptotic signaling pathway in absence of ligand	4	0.209821	0.0377679
BP	myeloid leukocyte migration	7	0.210062	0.0378823
BP	regulation of leukocyte migration	7	0.215231	0.0388874
BP	NAD metabolic process	4	0.218074	0.0394751
BP	smooth muscle contraction	5	0.22112	0.040301
BP	cellular calcium ion homeostasis	13	0.22112	0.0403197
BP	organic anion transport	14	0.22112	0.0404891
BP	cardiac muscle tissue development	8	0.22112	0.0409361
BP	glycerol metabolic process	2	0.22112	0.0411166
BP	cAMP catabolic process	2	0.22112	0.0411166
BP	positive regulation of transcription of Notch receptor target	2	0.22112	0.0411166
BP	female genitalia development	2	0.22112	0.0411166
BP	CD4-positive, alpha-beta T cell cytokine production	2	0.22112	0.0411166
BP	lipoprotein transport	2	0.22112	0.0411166
BP	lipoprotein localization	2	0.22112	0.0411166
BP	paraxial mesoderm development	2	0.22112	0.0411166
BP	negative regulation of morphogenesis of an epithelium	2	0.22112	0.0411166
BP	glutamine family amino acid metabolic process	4	0.22112	0.0412258
BP	regulation of chemokine production	4	0.22112	0.0412258
BP	CD4-positive, alpha-beta T cell activation	4	0.22112	0.0412258
BP	ovulation cycle process	3	0.225901	0.0423468
BP	positive regulation of interleukin-1 production	3	0.225901	0.0423468
BP	regulation of interleukin-1 secretion	3	0.225901	0.0423468
BP	negative regulation of transforming growth factor beta receptor signaling pathway	4	0.228665	0.0430199
BP	nephron tubule morphogenesis	4	0.228665	0.0430199
BP	camera-type eye development	10	0.229006	0.0431617
BP	calcium ion transport into cytosol	6	0.233604	0.0441862
BP	regulation of protein secretion	13	0.233604	0.0443135
BP	carbohydrate homeostasis	8	0.233604	0.0448082
BP	glucose homeostasis	8	0.233604	0.0448082
BP	smooth muscle cell migration	4	0.233604	0.0448574
BP	negative regulation of stress-activated MAPK cascade	3	0.233604	0.044858
BP	cofactor transport	3	0.233604	0.044858
BP	negative regulation of stress-activated protein kinase signaling cascade	3	0.233604	0.044858
BP	Notch signaling pathway	7	0.233604	0.0452849
BP	desensitization of G-protein coupled receptor protein signaling pathway	2	0.233604	0.0454172
BP	negative adaptation of signaling pathway	2	0.233604	0.0454172
BP	negative regulation of chondrocyte differentiation	2	0.233604	0.0454172
BP	integrin activation	2	0.233604	0.0454172
BP	negative regulation of tissue remodeling	2	0.233604	0.0454172
BP	negative regulation of fibroblast growth factor receptor signaling pathway	2	0.233604	0.0454172
BP	angiogenesis involved in wound healing	2	0.233604	0.0454172
BP	response to nitric oxide	2	0.233604	0.0454172
BP	digestive system development	6	0.233604	0.0454539
BP	negative regulation of cell development	10	0.234271	0.045663
BP	alpha-amino acid metabolic process	8	0.234631	0.0458126
BP	regulation of transforming growth factor beta receptor signaling pathway	5	0.235517	0.0461454
BP	antimicrobial humoral response	5	0.235517	0.0461454
BP	cell migration involved in sprouting angiogenesis	4	0.237311	0.0467383
BP	nephron epithelium morphogenesis	4	0.237311	0.0467383
BP	negative regulation of cellular response to transforming growth factor beta stimulus	4	0.237311	0.0467383
BP	embryonic cranial skeleton morphogenesis	3	0.240056	0.0474416
BP	regulation of glycoprotein metabolic process	3	0.240056	0.0474416
BP	terpenoid metabolic process	5	0.240444	0.0476813
BP	stem cell proliferation	5	0.240444	0.0476813
BP	calcium ion homeostasis	13	0.240869	0.0478471
BP	response to tumor necrosis factor	10	0.242449	0.0482608
BP	divalent inorganic cation homeostasis	14	0.242449	0.0483254
BP	regulation of biomineral tissue development	4	0.243725	0.0486624
BP	Wnt signaling pathway, planar cell polarity pathway	5	0.245084	0.0492471
BP	regulation of cellular response to transforming growth factor beta stimulus	5	0.245084	0.0492471
BP	cartilage condensation	2	0.245084	0.0498752
BP	cardiac right ventricle morphogenesis	2	0.245084	0.0498752
BP	copper ion transport	2	0.245084	0.0498752
BP	regulation of macrophage differentiation	2	0.245084	0.0498752
BP	decidualization	2	0.245084	0.0498752
BP	immunoglobulin secretion	2	0.245084	0.0498752
BP	cellular response to vitamin D	2	0.245084	0.0498752
BP	regulation of bicellular tight junction assembly	2	0.245084	0.0498752
BP	cell junction assembly	8	0.245084	0.0499775
BP	negative regulation of response to external stimulus	10	0.245084	0.0500468
BP	regulation of chondrocyte differentiation	3	0.245084	0.0500968
BP	genitalia development	3	0.245084	0.0500968
BP	renal tubule morphogenesis	4	0.246872	0.0506298
BP	mononuclear cell migration	4	0.246872	0.0506298
BP	positive regulation of epithelial cell migration	6	0.247051	0.0507501
BP	hormone secretion	10	0.251741	0.0518766
BP	morphogenesis of embryonic epithelium	6	0.251741	0.0521308
BP	regulation of establishment of planar polarity	5	0.251741	0.0524689
BP	regulation of receptor-mediated endocytosis	4	0.251741	0.0526402
BP	neural crest cell migration	3	0.251741	0.052823
BP	positive regulation of epithelial to mesenchymal transition	3	0.251741	0.052823
BP	calcium-dependent cell-cell adhesion via plasma membrane cell adhesion molecules	3	0.251741	0.052823
BP	cellular carbohydrate catabolic process	3	0.251741	0.052823
BP	icosanoid biosynthetic process	3	0.251741	0.052823
BP	negative regulation of peptidyl-tyrosine phosphorylation	3	0.251741	0.052823
BP	endocrine hormone secretion	3	0.251741	0.052823
BP	regulation of granulocyte chemotaxis	3	0.251741	0.052823
BP	regulation of endothelial cell apoptotic process	3	0.251741	0.052823
BP	anatomical structure homeostasis	12	0.253364	0.0532495
BP	ethanol metabolic process	2	0.254314	0.0544836
BP	phosphate ion transport	2	0.254314	0.0544836
BP	cyclic nucleotide catabolic process	2	0.254314	0.0544836
BP	alditol metabolic process	2	0.254314	0.0544836
BP	adaptation of signaling pathway	2	0.254314	0.0544836
BP	regulation of interleukin-13 production	2	0.254314	0.0544836
BP	regulation of interleukin-5 production	2	0.254314	0.0544836
BP	steroid hormone secretion	2	0.254314	0.0544836
BP	smooth muscle tissue development	2	0.254314	0.0544836
BP	cardiac myofibril assembly	2	0.254314	0.0544836
BP	response to hyperoxia	2	0.254314	0.0544836
BP	cell aggregation	2	0.254314	0.0544836
BP	chemokine production	4	0.254489	0.0546936
BP	muscle tissue morphogenesis	4	0.254489	0.0546936
BP	positive regulation of epithelial cell proliferation	7	0.254643	0.0548131
BP	ventricular cardiac muscle tissue morphogenesis	3	0.257577	0.0556193
BP	face development	3	0.257577	0.0556193
BP	cell-cell junction assembly	5	0.257656	0.0558109
BP	mucopolysaccharide metabolic process	5	0.257656	0.0558109
BP	regulation of endocytosis	8	0.261224	0.0566723
BP	myeloid leukocyte differentiation	7	0.264057	0.0573764
BP	prostaglandin biosynthetic process	2	0.270084	0.0592354
BP	cobalamin metabolic process	2	0.270084	0.0592354
BP	interleukin-5 production	2	0.270084	0.0592354
BP	prostanoid biosynthetic process	2	0.270084	0.0592354
BP	branching involved in salivary gland morphogenesis	2	0.270084	0.0592354
BP	hematopoietic stem cell proliferation	2	0.270084	0.0592354
BP	cytosolic calcium ion transport	6	0.27679	0.0608937
BP	regulation of response to wounding	6	0.27679	0.0608937
BP	bone remodeling	4	0.277346	0.0611101
BP	interleukin-1 secretion	3	0.277891	0.0614187
BP	positive regulation of extrinsic apoptotic signaling pathway	3	0.277891	0.0614187
BP	regulation of JUN kinase activity	4	0.28364	0.0633337
BP	negative regulation of response to wounding	4	0.28364	0.0633337
BP	hormone transport	10	0.28364	0.0637899
BP	positive regulation of secretion by cell	11	0.28364	0.0641029
BP	dendritic cell chemotaxis	2	0.28364	0.0641241
BP	regulation of cellular extravasation	2	0.28364	0.0641241
BP	regulation of T cell cytokine production	2	0.28364	0.0641241
BP	vitamin biosynthetic process	2	0.28364	0.0641241
BP	toxin metabolic process	2	0.28364	0.0641241
BP	negative regulation of steroid biosynthetic process	2	0.28364	0.0641241
BP	interleukin-13 production	2	0.28364	0.0641241
BP	tooth mineralization	2	0.28364	0.0641241
BP	regulation of execution phase of apoptosis	2	0.28364	0.0641241
BP	negative regulation of JAK-STAT cascade	3	0.28364	0.0644199
BP	positive regulation of fibroblast proliferation	3	0.28364	0.0644199
BP	protein trimerization	3	0.28364	0.0644199
BP	cellular response to cAMP	3	0.28364	0.0644199
BP	negative regulation of STAT cascade	3	0.28364	0.0644199
BP	sulfur compound metabolic process	11	0.286216	0.0651019
BP	regulation of fibroblast proliferation	4	0.287546	0.0655994
BP	regulation of lipase activity	4	0.287546	0.0655994
BP	internal protein amino acid acetylation	6	0.292446	0.0671932
BP	homophilic cell adhesion via plasma membrane adhesion molecules	6	0.292446	0.0671932
BP	platelet activation	6	0.292446	0.0671932
BP	negative regulation of cytokine-mediated signaling pathway	3	0.292446	0.0674877
BP	NAD biosynthetic process	3	0.292446	0.0674877
BP	positive regulation of wound healing	3	0.292446	0.0674877
BP	regulation of peptide secretion	13	0.292446	0.0675282
BP	positive regulation of cytokine production	12	0.292446	0.0676006
BP	cell-cell junction organization	8	0.292446	0.0677389
BP	muscle cell migration	4	0.292446	0.0679069
BP	fibroblast proliferation	4	0.292446	0.0679069
BP	muscle organ morphogenesis	4	0.292446	0.0679069
BP	cyclic-nucleotide-mediated signaling	6	0.294147	0.0688252
BP	activation of phospholipase C activity	2	0.294147	0.0691431
BP	positive regulation of collagen metabolic process	2	0.294147	0.0691431
BP	membrane protein intracellular domain proteolysis	2	0.294147	0.0691431
BP	microvillus organization	2	0.294147	0.0691431
BP	positive regulation of collagen biosynthetic process	2	0.294147	0.0691431
BP	positive regulation of activated T cell proliferation	2	0.294147	0.0691431
BP	cochlea morphogenesis	2	0.294147	0.0691431
BP	cellular amino acid metabolic process	11	0.294147	0.0691993
BP	neutrophil chemotaxis	4	0.297192	0.070256
BP	establishment of planar polarity	5	0.297192	0.0703783
BP	embryonic epithelial tube formation	5	0.297192	0.0703783
BP	establishment of tissue polarity	5	0.297192	0.0703783
BP	tissue remodeling	6	0.297192	0.0704802
BP	cGMP metabolic process	3	0.297192	0.0706209
BP	purine-containing compound catabolic process	3	0.297192	0.0706209
BP	leukocyte chemotaxis	7	0.2996	0.0712946
BP	neural tube closure	4	0.304846	0.0726464
BP	ventricular cardiac muscle tissue development	3	0.305641	0.0738186
BP	cellular biogenic amine metabolic process	3	0.305641	0.0738186
BP	regulation of focal adhesion assembly	3	0.305641	0.0738186
BP	endothelial cell apoptotic process	3	0.305641	0.0738186
BP	regulation of cell-substrate junction assembly	3	0.305641	0.0738186
BP	chondrocyte development	2	0.305641	0.0742863
BP	outflow tract septum morphogenesis	2	0.305641	0.0742863
BP	negative regulation of cardiac muscle cell apoptotic process	2	0.305641	0.0742863
BP	chondroitin sulfate biosynthetic process	2	0.305641	0.0742863
BP	negative regulation of steroid metabolic process	2	0.305641	0.0742863
BP	positive regulation of positive chemotaxis	2	0.305641	0.0742863
BP	apoptotic process involved in morphogenesis	2	0.305641	0.0742863
BP	embryonic placenta morphogenesis	2	0.305641	0.0742863
BP	positive regulation of T cell migration	2	0.305641	0.0742863
BP	hair follicle development	4	0.308038	0.0750778
BP	tube closure	4	0.308038	0.0750778
BP	regulation of morphogenesis of a branching structure	3	0.315628	0.0770797
BP	aging	9	0.315628	0.0771416
BP	embryonic placenta development	4	0.316421	0.0775499
BP	negative regulation of cysteine-type endopeptidase activity involved in apoptotic process	4	0.316421	0.0775499
BP	negative regulation of cell projection organization	6	0.318684	0.0790969
BP	organ growth	6	0.318684	0.0790969
BP	cell maturation	6	0.318684	0.0790969
BP	positive regulation of blood coagulation	2	0.318684	0.0795475
BP	plasminogen activation	2	0.318684	0.0795475
BP	positive regulation of Rho protein signal transduction	2	0.318684	0.0795475
BP	regulation of positive chemotaxis	2	0.318684	0.0795475
BP	cell differentiation involved in embryonic placenta development	2	0.318684	0.0795475
BP	prostate gland epithelium morphogenesis	2	0.318684	0.0795475
BP	regulation of androgen receptor signaling pathway	2	0.318684	0.0795475
BP	positive regulation of hemostasis	2	0.318684	0.0795475
BP	retinoid metabolic process	4	0.318684	0.0800624
BP	post-embryonic development	4	0.318684	0.0800624
BP	axis specification	4	0.318684	0.0800624
BP	molting cycle process	4	0.318684	0.0800624
BP	hair cycle process	4	0.318684	0.0800624
BP	alpha-beta T cell differentiation	4	0.318684	0.0800624
BP	skin epidermis development	4	0.318684	0.0800624
BP	peptidyl-tyrosine phosphorylation	11	0.318684	0.080157
BP	neuron projection regeneration	3	0.318803	0.0804031
BP	negative regulation of response to cytokine stimulus	3	0.318803	0.0804031
BP	response to nutrient	7	0.318879	0.0805304
BP	isoprenoid metabolic process	5	0.326166	0.0825497
BP	water-soluble vitamin metabolic process	4	0.326166	0.0826149
BP	regulation of JNK cascade	6	0.326166	0.0827025
BP	peptidyl-tyrosine modification	11	0.329126	0.0836448
BP	glutathione metabolic process	3	0.329126	0.0837877
BP	regulation of adherens junction organization	3	0.329126	0.0837877
BP	cellular response to interleukin-1	6	0.330061	0.0845391
BP	regulation of the force of heart contraction	2	0.330061	0.0849208
BP	substrate-dependent cell migration	2	0.330061	0.0849208
BP	regulation of interleukin-4 production	2	0.330061	0.0849208
BP	positive regulation of monooxygenase activity	2	0.330061	0.0849208
BP	dendritic cell migration	2	0.330061	0.0849208
BP	positive regulation of coagulation	2	0.330061	0.0849208
BP	blood coagulation, fibrin clot formation	2	0.330061	0.0849208
BP	positive regulation of T cell activation	7	0.331474	0.0853967
BP	positive regulation of cell-cell adhesion	8	0.33308	0.0859233
BP	epithelial tube formation	5	0.336191	0.0868397
BP	regulation of protein kinase B signaling	7	0.336584	0.0870554
BP	negative regulation of peptidase activity	8	0.33759	0.08743
BP	response to hypoxia	10	0.34165	0.0885973
BP	central nervous system neuron differentiation	6	0.342292	0.0901836
BP	regulation of cytokine secretion	6	0.342292	0.0901836
BP	negative regulation of striated muscle cell apoptotic process	2	0.342292	0.0904005
BP	fucosylation	2	0.342292	0.0904005
BP	response to increased oxygen levels	2	0.342292	0.0904005
BP	regulation of B cell differentiation	2	0.342292	0.0904005
BP	prostate gland morphogenesis	2	0.342292	0.0904005
BP	regulation of transforming growth factor beta production	2	0.342292	0.0904005
BP	dorsal/ventral pattern formation	4	0.342292	0.0905093
BP	primary neural tube formation	4	0.342292	0.0905093
BP	positive regulation of T cell proliferation	4	0.342292	0.0905093
BP	negative regulation of intrinsic apoptotic signaling pathway	4	0.342292	0.0905093
BP	branching involved in ureteric bud morphogenesis	3	0.342292	0.0907363
BP	primary alcohol metabolic process	3	0.342292	0.0907363
BP	animal organ formation	3	0.342292	0.0907363
BP	positive chemotaxis	3	0.342292	0.0907363
BP	regulation of extrinsic apoptotic signaling pathway via death domain receptors	3	0.342292	0.0907363
BP	regulation of insulin secretion	6	0.347029	0.0921097
BP	T cell activation involved in immune response	4	0.350758	0.0932185
BP	developmental maturation	8	0.351785	0.0936105
BP	positive regulation of secretion	11	0.355298	0.0946659
BP	amine metabolic process	5	0.355708	0.0957625
BP	muscle system process	12	0.355708	0.0959003
BP	response to steroid hormone	11	0.355708	0.0959421
BP	female gonad development	4	0.355708	0.0959658
BP	negative regulation of developmental growth	4	0.355708	0.0959658
BP	positive regulation of histone acetylation	2	0.355708	0.095981
BP	negative regulation of cytokine biosynthetic process	2	0.355708	0.095981
BP	regulation of neuron projection regeneration	2	0.355708	0.095981
BP	transforming growth factor beta production	2	0.355708	0.095981
BP	negative regulation of signal transduction by p53 class mediator	2	0.355708	0.095981
BP	positive regulation of response to wounding	3	0.361609	0.0979163
BP	regulation of ERK1 and ERK2 cascade	9	0.361609	0.0979786
BP	pyridine-containing compound metabolic process	6	0.361609	0.0980208
BP	positive regulation of canonical Wnt signaling pathway	5	0.361609	0.0980636
BP	neutrophil migration	4	0.36369	0.098751
BP	developmental growth involved in morphogenesis	7	0.364798	0.0991757
BP	response to decreased oxygen levels	10	0.36514	0.0993922
BP	positive regulation of leukocyte cell-cell adhesion	7	0.368043	0.100979
BP	negative regulation of axonogenesis	3	0.368043	0.10159
BP	regulation of type 2 immune response	2	0.368043	0.101657
BP	specification of animal organ identity	2	0.368043	0.101657
BP	regulation of keratinocyte proliferation	2	0.368043	0.101657
BP	negative regulation of interferon-gamma production	2	0.368043	0.101657
BP	regulation of DNA damage response, signal transduction by p53 class mediator	2	0.368043	0.101657
BP	chondroitin sulfate proteoglycan biosynthetic process	2	0.368043	0.101657
BP	positive regulation of filopodium assembly	2	0.368043	0.101657
BP	positive regulation of neutrophil chemotaxis	2	0.368043	0.101657
BP	positive regulation of peptidyl-lysine acetylation	2	0.368043	0.101657
BP	regulation of hormone secretion	8	0.368043	0.10168
BP	morphogenesis of a polarized epithelium	5	0.370737	0.102749
BP	retina development in camera-type eye	5	0.370737	0.102749
BP	extrinsic apoptotic signaling pathway	7	0.370737	0.102801
BP	anion transmembrane transport	8	0.378222	0.105014
BP	negative regulation of neuron projection development	5	0.378222	0.105133
BP	carbohydrate catabolic process	6	0.381315	0.106208
BP	carbohydrate biosynthetic process	7	0.381315	0.106497
BP	maternal placenta development	2	0.381315	0.107423
BP	axis elongation	2	0.381315	0.107423
BP	leukotriene metabolic process	2	0.381315	0.107423
BP	aorta morphogenesis	2	0.381315	0.107423
BP	negative regulation of B cell activation	2	0.381315	0.107423
BP	cellular response to interleukin-4	2	0.381315	0.107423
BP	regulation of extracellular matrix organization	2	0.381315	0.107423
BP	negative regulation of endothelial cell apoptotic process	2	0.381315	0.107423
BP	positive regulation of lymphocyte migration	2	0.381315	0.107423
BP	antibiotic metabolic process	5	0.381315	0.107544
BP	ovulation cycle	3	0.385904	0.1091
BP	positive regulation of lipid biosynthetic process	3	0.385904	0.1091
BP	regulation of reproductive process	5	0.388559	0.109982
BP	development of primary female sexual characteristics	4	0.389078	0.110261
BP	maintenance of location	9	0.393591	0.111902
BP	membrane protein proteolysis	3	0.393591	0.112933
BP	embryonic digit morphogenesis	3	0.393591	0.112933
BP	organic hydroxy compound catabolic process	3	0.393591	0.112933
BP	cranial skeletal system development	3	0.393591	0.112933
BP	neural tube formation	4	0.393591	0.113228
BP	positive regulation of transmembrane receptor protein serine/threonine kinase signaling pathway	4	0.393591	0.113228
BP	positive regulation of T cell mediated immunity	2	0.393591	0.113274
BP	proximal/distal pattern formation	2	0.393591	0.113274
BP	regulation of vascular endothelial growth factor production	2	0.393591	0.113274
BP	negative regulation of intracellular steroid hormone receptor signaling pathway	2	0.393591	0.113274
BP	cellular response to interleukin-6	2	0.393591	0.113274
BP	positive regulation of granulocyte chemotaxis	2	0.393591	0.113274
BP	response to ketone	6	0.398212	0.114739
BP	axon development	13	0.40197	0.115978
BP	granulocyte chemotaxis	4	0.40197	0.116231
BP	negative regulation of extrinsic apoptotic signaling pathway	4	0.40197	0.116231
BP	regulation of neuron projection development	12	0.402111	0.116433
BP	regulation of smooth muscle cell migration	3	0.402111	0.116817
BP	secondary metabolic process	3	0.402111	0.116817
BP	SMAD protein signal transduction	3	0.402111	0.116817
BP	cell junction organization	8	0.4028	0.117153
BP	actomyosin structure organization	6	0.403025	0.119131
BP	negative regulation of cell-matrix adhesion	2	0.403025	0.119206
BP	regulation of animal organ formation	2	0.403025	0.119206
BP	purine ribonucleotide catabolic process	2	0.403025	0.119206
BP	positive regulation of BMP signaling pathway	2	0.403025	0.119206
BP	interleukin-4 production	2	0.403025	0.119206
BP	embryonic forelimb morphogenesis	2	0.403025	0.119206
BP	regulation of fibroblast growth factor receptor signaling pathway	2	0.403025	0.119206
BP	axon extension involved in axon guidance	2	0.403025	0.119206
BP	acylglycerol homeostasis	2	0.403025	0.119206
BP	triglyceride homeostasis	2	0.403025	0.119206
BP	neuron projection extension involved in neuron projection guidance	2	0.403025	0.119206
BP	positive regulation of neutrophil migration	2	0.403025	0.119206
BP	regulation of T cell migration	2	0.403025	0.119206
BP	response to retinoic acid	4	0.403025	0.119268
BP	tube formation	5	0.405031	0.119999
BP	nitric oxide biosynthetic process	3	0.405708	0.12075
BP	regulation of bone mineralization	3	0.405708	0.12075
BP	neuron fate commitment	3	0.405708	0.12075
BP	cardiac muscle tissue morphogenesis	3	0.405708	0.12075
BP	sulfur compound biosynthetic process	6	0.407287	0.121358
BP	regulation of developmental growth	9	0.408195	0.121767
BP	cyclic nucleotide metabolic process	5	0.410416	0.122568
BP	axonogenesis	12	0.41251	0.123334
BP	regulation of muscle cell apoptotic process	3	0.412553	0.124731
BP	positive regulation of insulin secretion	3	0.412553	0.124731
BP	positive regulation of carbohydrate metabolic process	3	0.412553	0.124731
BP	cardiac septum morphogenesis	3	0.412553	0.124731
BP	ERK1 and ERK2 cascade	9	0.412553	0.125157
BP	T cell cytokine production	2	0.412553	0.125212
BP	salivary gland morphogenesis	2	0.412553	0.125212
BP	ribonucleotide catabolic process	2	0.412553	0.125212
BP	vascular endothelial growth factor production	2	0.412553	0.125212
BP	response to interleukin-4	2	0.412553	0.125212
BP	negative regulation of signal transduction in absence of ligand	2	0.412553	0.125212
BP	regulation of heart morphogenesis	2	0.412553	0.125212
BP	negative regulation of extrinsic apoptotic signaling pathway in absence of ligand	2	0.412553	0.125212
BP	inorganic anion transmembrane transport	4	0.412553	0.125444
BP	glucose transmembrane transport	4	0.412553	0.125444
BP	protein acetylation	6	0.413502	0.125873
BP	regulation of lipid metabolic process	10	0.419617	0.127974
BP	response to xenobiotic stimulus	8	0.419617	0.128133
BP	response to alcohol	6	0.419617	0.128161
BP	positive regulation of calcium ion transport	4	0.420064	0.128582
BP	actin-mediated cell contraction	4	0.420064	0.128582
BP	negative regulation of response to DNA damage stimulus	3	0.420179	0.12876
BP	positive regulation of ERK1 and ERK2 cascade	7	0.424213	0.13014
BP	cAMP-mediated signaling	5	0.424349	0.130429
BP	response to interleukin-1	6	0.424349	0.130469
BP	prostanoid metabolic process	2	0.42561	0.13129
BP	prostaglandin metabolic process	2	0.42561	0.13129
BP	embryonic eye morphogenesis	2	0.42561	0.13129
BP	cellular component assembly involved in morphogenesis	4	0.426642	0.131753
BP	cardiac muscle cell development	3	0.429672	0.132834
BP	alcohol metabolic process	9	0.432486	0.133851
BP	icosanoid metabolic process	4	0.435103	0.134956
BP	negative regulation of cysteine-type endopeptidase activity	4	0.435103	0.134956
BP	regulation of actin filament-based process	10	0.438081	0.136169
BP	regulation of interleukin-1 production	3	0.438081	0.136953
BP	nitric oxide metabolic process	3	0.438081	0.136953
BP	import across plasma membrane	3	0.438081	0.136953
BP	positive regulation of cytokine production involved in immune response	2	0.438081	0.137434
BP	heart valve morphogenesis	2	0.438081	0.137434
BP	positive regulation of smooth muscle cell migration	2	0.438081	0.137434
BP	triglyceride biosynthetic process	2	0.438081	0.137434
BP	regulation of CD4-positive, alpha-beta T cell differentiation	2	0.438081	0.137434
BP	negative chemotaxis	2	0.438081	0.137434
BP	respiratory system development	6	0.438081	0.137513
BP	positive regulation of response to external stimulus	8	0.438129	0.137676
BP	cellular response to extracellular stimulus	7	0.44047	0.138561
BP	muscle cell apoptotic process	3	0.447739	0.141115
BP	internal peptidyl-lysine acetylation	5	0.447739	0.141254
BP	molting cycle	4	0.447739	0.141455
BP	hair cycle	4	0.447739	0.141455
BP	cytokine secretion	6	0.449949	0.142306
BP	hindlimb morphogenesis	2	0.451263	0.143639
BP	positive regulation of epidermal growth factor receptor signaling pathway	2	0.451263	0.143639
BP	regulation of activated T cell proliferation	2	0.451263	0.143639
BP	dopaminergic neuron differentiation	2	0.451263	0.143639
BP	regulation of cardiac muscle cell contraction	2	0.451263	0.143639
BP	positive regulation of protein acetylation	2	0.451263	0.143639
BP	hexose transmembrane transport	4	0.454122	0.144751
BP	cell-substrate adherens junction assembly	3	0.454122	0.145319
BP	response to estrogen	3	0.454122	0.145319
BP	focal adhesion assembly	3	0.454122	0.145319
BP	calcium ion import	3	0.454122	0.145319
BP	striated muscle cell development	5	0.458295	0.14681
BP	negative regulation of endopeptidase activity	7	0.459158	0.147242
BP	regulation of myeloid leukocyte differentiation	4	0.460638	0.148077
BP	positive regulation of production of molecular mediator of immune response	3	0.460638	0.149564
BP	regulation of release of sequestered calcium ion into cytosol	3	0.460638	0.149564
BP	reactive nitrogen species metabolic process	3	0.460638	0.149564
BP	JNK cascade	6	0.460638	0.149638
BP	positive regulation of immunoglobulin production	2	0.460638	0.149903
BP	Wnt signaling pathway, calcium modulating pathway	2	0.460638	0.149903
BP	salivary gland development	2	0.460638	0.149903
BP	regulation of cardiac muscle cell apoptotic process	2	0.460638	0.149903
BP	neutral lipid biosynthetic process	2	0.460638	0.149903
BP	acylglycerol biosynthetic process	2	0.460638	0.149903
BP	positive regulation of release of sequestered calcium ion into cytosol	2	0.460638	0.149903
BP	negative regulation of extrinsic apoptotic signaling pathway via death domain receptors	2	0.460638	0.149903
BP	macrophage migration	2	0.460638	0.149903
BP	positive regulation of protein transport	11	0.461376	0.150299
BP	monosaccharide transmembrane transport	4	0.46437	0.151432
BP	peptide hormone secretion	7	0.464639	0.151677
BP	neural tube development	5	0.466545	0.152457
BP	regulation of smoothened signaling pathway	3	0.469068	0.153848
BP	T cell costimulation	3	0.469068	0.153848
BP	cardiac cell development	3	0.469068	0.153848
BP	protein kinase B signaling	7	0.469068	0.153918
BP	alpha-beta T cell activation	4	0.470411	0.154816
BP	regulation of cell-cell adhesion	10	0.470411	0.155147
BP	positive regulation of cell growth	5	0.470411	0.155315
BP	NADH metabolic process	2	0.470411	0.15622
BP	muscle filament sliding	2	0.470411	0.15622
BP	macrophage differentiation	2	0.470411	0.15622
BP	actin-myosin filament sliding	2	0.470411	0.15622
BP	T-helper 1 type immune response	2	0.470411	0.15622
BP	regulation of macrophage activation	2	0.470411	0.15622
BP	positive regulation of ERBB signaling pathway	2	0.470411	0.15622
BP	Rho protein signal transduction	6	0.470411	0.157137
BP	positive regulation of adaptive immune response based on somatic recombination of immune receptors built from immunoglobulin superfamily domains	3	0.470411	0.158171
BP	negative regulation of endothelial cell migration	3	0.470411	0.158171
BP	lymphocyte costimulation	3	0.470411	0.158171
BP	negative regulation of MAP kinase activity	3	0.470411	0.158171
BP	polyol metabolic process	4	0.470411	0.158228
BP	insulin secretion	6	0.470411	0.159673
BP	peptidyl-lysine acetylation	5	0.470411	0.161097
BP	response to corticosteroid	5	0.470411	0.161097
BP	carbohydrate transmembrane transport	4	0.470411	0.161668
BP	granulocyte migration	4	0.470411	0.161668
BP	second-messenger-mediated signaling	9	0.470411	0.161752
BP	negative regulation of neuron differentiation	6	0.470411	0.162227
BP	regulation of peptide hormone secretion	6	0.470411	0.162227
BP	gluconeogenesis	3	0.470411	0.162531
BP	cell fate determination	2	0.470411	0.162586
BP	heart valve development	2	0.470411	0.162586
BP	regulation of striated muscle cell apoptotic process	2	0.470411	0.162586
BP	stem cell division	2	0.470411	0.162586
BP	cellular response to epidermal growth factor stimulus	2	0.470411	0.162586
BP	positive regulation of kidney development	2	0.470411	0.162586
BP	negative regulation of proteolysis	9	0.470411	0.163705
BP	regulation of muscle contraction	5	0.470411	0.16402
BP	visual perception	6	0.470411	0.164798
BP	negative regulation of cell adhesion	7	0.470411	0.16535
BP	signal release	11	0.470411	0.16554
BP	endothelial cell morphogenesis	1	0.470411	0.166637
BP	desmosome organization	1	0.470411	0.166637
BP	histidine metabolic process	1	0.470411	0.166637
BP	receptor guanylyl cyclase signaling pathway	1	0.470411	0.166637
BP	negative regulation of collagen metabolic process	1	0.470411	0.166637
BP	phenol-containing compound catabolic process	1	0.470411	0.166637
BP	hindbrain radial glia guided cell migration	1	0.470411	0.166637
BP	glomerular basement membrane development	1	0.470411	0.166637
BP	transforming growth factor beta1 production	1	0.470411	0.166637
BP	regulation of transforming growth factor beta1 production	1	0.470411	0.166637
BP	regulation of integrin activation	1	0.470411	0.166637
BP	cellular response to interferon-alpha	1	0.470411	0.166637
BP	tetrahydrofolate interconversion	1	0.470411	0.166637
BP	serotonin metabolic process	1	0.470411	0.166637
BP	retinal cone cell differentiation	1	0.470411	0.166637
BP	drinking behavior	1	0.470411	0.166637
BP	surfactant homeostasis	1	0.470411	0.166637
BP	regulation of T-helper 1 cell differentiation	1	0.470411	0.166637
BP	retinal cone cell development	1	0.470411	0.166637
BP	embryonic viscerocranium morphogenesis	1	0.470411	0.166637
BP	negative regulation of fibrinolysis	1	0.470411	0.166637
BP	alditol phosphate metabolic process	1	0.470411	0.166637
BP	regulation of oocyte development	1	0.470411	0.166637
BP	prostatic bud formation	1	0.470411	0.166637
BP	dichotomous subdivision of an epithelial terminal unit	1	0.470411	0.166637
BP	lung secretory cell differentiation	1	0.470411	0.166637
BP	regulation of type B pancreatic cell proliferation	1	0.470411	0.166637
BP	regulation of tooth mineralization	1	0.470411	0.166637
BP	pyrimidine-containing compound transmembrane transport	1	0.470411	0.166637
BP	fibroblast activation	1	0.470411	0.166637
BP	caveolin-mediated endocytosis	1	0.470411	0.166637
BP	leukotriene D4 metabolic process	1	0.470411	0.166637
BP	leukotriene D4 biosynthetic process	1	0.470411	0.166637
BP	regulation of apoptotic process involved in morphogenesis	1	0.470411	0.166637
BP	regulation of PERK-mediated unfolded protein response	1	0.470411	0.166637
BP	regulation of apoptotic process involved in development	1	0.470411	0.166637
BP	negative regulation of leukocyte adhesion to vascular endothelial cell	1	0.470411	0.166637
BP	lysosomal protein catabolic process	1	0.470411	0.166637
BP	regulation of oogenesis	1	0.470411	0.166637
BP	regulation of mesoderm formation	1	0.470411	0.166637
BP	regulation of chemokine (C-X-C motif) ligand 2 production	1	0.470411	0.166637
BP	fatty acid derivative metabolic process	5	0.470883	0.166964
BP	regulation of MAP kinase activity	9	0.472108	0.167646
BP	gland morphogenesis	4	0.472108	0.168629
BP	blood vessel remodeling	2	0.472108	0.168999
BP	cGMP biosynthetic process	2	0.472108	0.168999
BP	negative regulation of muscle cell apoptotic process	2	0.472108	0.168999
BP	cardiac muscle cell apoptotic process	2	0.472108	0.168999
BP	chondroitin sulfate metabolic process	2	0.472108	0.168999
BP	activated T cell proliferation	2	0.472108	0.168999
BP	metanephric nephron development	2	0.472108	0.168999
BP	negative regulation of epithelial cell apoptotic process	2	0.472108	0.168999
BP	response to fatty acid	3	0.478242	0.171357
BP	negative regulation of protein kinase activity	7	0.480661	0.172386
BP	cellular response to nutrient levels	6	0.486378	0.175254
BP	sensory perception of light stimulus	6	0.486378	0.175254
BP	unsaturated fatty acid biosynthetic process	2	0.486378	0.175453
BP	organic cation transport	2	0.486378	0.175453
BP	regulation of filopodium assembly	2	0.486378	0.175453
BP	regulation of actin filament-based movement	2	0.486378	0.175453
BP	positive regulation of adaptive immune response	3	0.486378	0.17582
BP	hexose biosynthetic process	3	0.486378	0.17582
BP	negative regulation of MAPK cascade	5	0.486378	0.175921
BP	interleukin-1 production	3	0.48839	0.180316
BP	positive regulation of axonogenesis	3	0.48839	0.180316
BP	leukocyte migration involved in inflammatory response	1	0.48839	0.181695
BP	heart field specification	1	0.48839	0.181695
BP	glutathione catabolic process	1	0.48839	0.181695
BP	serine family amino acid catabolic process	1	0.48839	0.181695
BP	negative regulation of cell fate commitment	1	0.48839	0.181695
BP	positive regulation of T cell chemotaxis	1	0.48839	0.181695
BP	regulation of gonadotropin secretion	1	0.48839	0.181695
BP	response to peptidoglycan	1	0.48839	0.181695
BP	phosphate ion transmembrane transport	1	0.48839	0.181695
BP	positive regulation of vascular permeability	1	0.48839	0.181695
BP	regulation of chemokine biosynthetic process	1	0.48839	0.181695
BP	aldehyde catabolic process	1	0.48839	0.181695
BP	enteric nervous system development	1	0.48839	0.181695
BP	limb bud formation	1	0.48839	0.181695
BP	bronchus development	1	0.48839	0.181695
BP	prostate glandular acinus development	1	0.48839	0.181695
BP	establishment of blood-brain barrier	1	0.48839	0.181695
BP	cardiac neural crest cell differentiation involved in heart development	1	0.48839	0.181695
BP	cardiac neural crest cell development involved in heart development	1	0.48839	0.181695
BP	mucus secretion	1	0.48839	0.181695
BP	cellular response to follicle-stimulating hormone stimulus	1	0.48839	0.181695
BP	cellular response to acidic pH	1	0.48839	0.181695
BP	positive regulation of membrane depolarization	1	0.48839	0.181695
BP	positive regulation of transcription from RNA polymerase II promoter in response to endoplasmic reticulum stress	1	0.48839	0.181695
BP	regulation of histone H3-K9 acetylation	1	0.48839	0.181695
BP	regulation of type B pancreatic cell apoptotic process	1	0.48839	0.181695
BP	negative regulation of neuron migration	1	0.48839	0.181695
BP	striated muscle cell apoptotic process	2	0.48839	0.181946
BP	autonomic nervous system development	2	0.48839	0.181946
BP	chondroitin sulfate proteoglycan metabolic process	2	0.48839	0.181946
BP	establishment of cell polarity	4	0.490392	0.182858
BP	negative regulation of apoptotic signaling pathway	6	0.491051	0.18327
BP	positive regulation of growth	7	0.493296	0.184396
BP	lung development	5	0.493296	0.185056
BP	negative regulation of DNA binding transcription factor activity	5	0.493296	0.185056
BP	regulation of lipid biosynthetic process	5	0.493296	0.185056
BP	regulation of axonogenesis	5	0.493296	0.185056
BP	cellular response to steroid hormone stimulus	7	0.493296	0.18684
BP	regulation of endocrine process	2	0.493296	0.188474
BP	negative regulation of lymphocyte differentiation	2	0.493296	0.188474
BP	response to epidermal growth factor	2	0.493296	0.188474
BP	regulation of CD4-positive, alpha-beta T cell activation	2	0.493296	0.188474
BP	regulation of stress-activated MAPK cascade	6	0.493296	0.188694
BP	negative regulation of neurogenesis	7	0.493296	0.189296
BP	extrinsic apoptotic signaling pathway via death domain receptors	3	0.493296	0.1894
BP	adherens junction assembly	3	0.493296	0.1894
BP	regulation of epidermal growth factor receptor signaling pathway	3	0.493296	0.1894
BP	endocrine process	3	0.493296	0.1894
BP	response to estradiol	4	0.493296	0.190117
BP	regulation of neurotransmitter levels	8	0.493296	0.190401
BP	muscle cell development	5	0.493296	0.191241
BP	positive regulation of hemopoiesis	5	0.493296	0.191241
BP	regulation of stress-activated protein kinase signaling cascade	6	0.493296	0.191429
BP	positive regulation of hormone secretion	4	0.493296	0.193781
BP	defense response to Gram-negative bacterium	3	0.493296	0.193985
BP	pyridine nucleotide metabolic process	5	0.493296	0.194361
BP	nicotinamide nucleotide metabolic process	5	0.493296	0.194361
BP	positive regulation of interleukin-8 production	2	0.493296	0.195034
BP	epithelial cell differentiation involved in kidney development	2	0.493296	0.195034
BP	T cell selection	2	0.493296	0.195034
BP	regulation of bone remodeling	2	0.493296	0.195034
BP	response to bronchodilator	2	0.493296	0.195034
BP	regulation of angiotensin levels in blood	1	0.493296	0.196482
BP	angiotensin maturation	1	0.493296	0.196482
BP	pulmonary valve development	1	0.493296	0.196482
BP	pulmonary valve morphogenesis	1	0.493296	0.196482
BP	disaccharide metabolic process	1	0.493296	0.196482
BP	inositol metabolic process	1	0.493296	0.196482
BP	ethanol catabolic process	1	0.493296	0.196482
BP	ethanol oxidation	1	0.493296	0.196482
BP	oxaloacetate metabolic process	1	0.493296	0.196482
BP	negative regulation of heart rate	1	0.493296	0.196482
BP	regulation of plasminogen activation	1	0.493296	0.196482
BP	positive regulation of fibroblast migration	1	0.493296	0.196482
BP	regulation of T cell chemotaxis	1	0.493296	0.196482
BP	neural crest formation	1	0.493296	0.196482
BP	skeletal myofibril assembly	1	0.493296	0.196482
BP	dermatan sulfate biosynthetic process	1	0.493296	0.196482
BP	response to vitamin E	1	0.493296	0.196482
BP	cell-cell adhesion mediated by integrin	1	0.493296	0.196482
BP	positive regulation of heterotypic cell-cell adhesion	1	0.493296	0.196482
BP	regulation of peroxisome proliferator activated receptor signaling pathway	1	0.493296	0.196482
BP	chemokine biosynthetic process	1	0.493296	0.196482
BP	negative regulation of vascular permeability	1	0.493296	0.196482
BP	negative regulation of bone resorption	1	0.493296	0.196482
BP	positive regulation of collateral sprouting	1	0.493296	0.196482
BP	chemical homeostasis within a tissue	1	0.493296	0.196482
BP	peripheral nervous system neuron differentiation	1	0.493296	0.196482
BP	peripheral nervous system neuron development	1	0.493296	0.196482
BP	chemokine metabolic process	1	0.493296	0.196482
BP	actin crosslink formation	1	0.493296	0.196482
BP	imidazole-containing compound metabolic process	1	0.493296	0.196482
BP	phosphate ion homeostasis	1	0.493296	0.196482
BP	radial glial cell differentiation	1	0.493296	0.196482
BP	embryonic skeletal joint morphogenesis	1	0.493296	0.196482
BP	branching involved in prostate gland morphogenesis	1	0.493296	0.196482
BP	positive regulation of protein exit from endoplasmic reticulum	1	0.493296	0.196482
BP	divalent inorganic anion homeostasis	1	0.493296	0.196482
BP	trivalent inorganic anion homeostasis	1	0.493296	0.196482
BP	T-helper 17 cell lineage commitment	1	0.493296	0.196482
BP	chemokine (C-X-C motif) ligand 2 production	1	0.493296	0.196482
BP	G-protein coupled receptor signaling pathway involved in heart process	1	0.493296	0.196482
BP	positive regulation of chemokine secretion	1	0.493296	0.196482
BP	type B pancreatic cell apoptotic process	1	0.493296	0.196482
BP	ATP hydrolysis coupled anion transmembrane transport	1	0.493296	0.196482
BP	regulation of cell proliferation involved in kidney development	1	0.493296	0.196482
BP	cellular carbohydrate metabolic process	7	0.493533	0.196744
BP	response to reactive oxygen species	6	0.493618	0.196945
BP	smoothened signaling pathway	4	0.494167	0.197466
BP	respiratory tube development	5	0.494167	0.197499
BP	cell fate specification	3	0.496493	0.198597
BP	negative regulation of myeloid leukocyte differentiation	2	0.502776	0.201622
BP	purine nucleotide catabolic process	2	0.502776	0.201622
BP	negative regulation of G-protein coupled receptor protein signaling pathway	2	0.502776	0.201622
BP	proteoglycan metabolic process	3	0.50552	0.203236
BP	substrate adhesion-dependent cell spreading	3	0.50552	0.203236
BP	monosaccharide biosynthetic process	3	0.50552	0.203236
BP	epidermal growth factor receptor signaling pathway	4	0.506476	0.204901
BP	regulation of blood vessel endothelial cell migration	4	0.506476	0.204901
BP	positive regulation of myeloid cell differentiation	3	0.506476	0.2079
BP	negative regulation of fat cell differentiation	2	0.506476	0.208235
BP	positive regulation of oxidoreductase activity	2	0.506476	0.208235
BP	nicotinamide nucleotide biosynthetic process	4	0.506476	0.208649
BP	pyridine nucleotide biosynthetic process	4	0.506476	0.208649
BP	positive regulation of lymphocyte proliferation	4	0.506476	0.208649
BP	phagolysosome assembly	1	0.506476	0.211003
BP	positive regulation of cellular extravasation	1	0.506476	0.211003
BP	polyamine biosynthetic process	1	0.506476	0.211003
BP	UV protection	1	0.506476	0.211003
BP	quaternary ammonium group transport	1	0.506476	0.211003
BP	basic amino acid transport	1	0.506476	0.211003
BP	gamma-aminobutyric acid transport	1	0.506476	0.211003
BP	spinal cord motor neuron cell fate specification	1	0.506476	0.211003
BP	dermatan sulfate metabolic process	1	0.506476	0.211003
BP	positive regulation of pseudopodium assembly	1	0.506476	0.211003
BP	regulation of guanylate cyclase activity	1	0.506476	0.211003
BP	positive regulation of hormone metabolic process	1	0.506476	0.211003
BP	positive regulation of interleukin-5 production	1	0.506476	0.211003
BP	Notch receptor processing, ligand-dependent	1	0.506476	0.211003
BP	regulation of cell fate specification	1	0.506476	0.211003
BP	regulation of secondary metabolic process	1	0.506476	0.211003
BP	positive regulation of insulin-like growth factor receptor signaling pathway	1	0.506476	0.211003
BP	histone H3-K9 acetylation	1	0.506476	0.211003
BP	positive regulation of macrophage differentiation	1	0.506476	0.211003
BP	glycosphingolipid catabolic process	1	0.506476	0.211003
BP	cardiac muscle fiber development	1	0.506476	0.211003
BP	white fat cell differentiation	1	0.506476	0.211003
BP	lateral sprouting from an epithelium	1	0.506476	0.211003
BP	positive regulation of inositol phosphate biosynthetic process	1	0.506476	0.211003
BP	eyelid development in camera-type eye	1	0.506476	0.211003
BP	cellular response to estrogen stimulus	1	0.506476	0.211003
BP	cellular response to cholesterol	1	0.506476	0.211003
BP	striated muscle myosin thick filament assembly	1	0.506476	0.211003
BP	cellular response to epinephrine stimulus	1	0.506476	0.211003
BP	regulation of nephron tubule epithelial cell differentiation	1	0.506476	0.211003
BP	ureter development	1	0.506476	0.211003
BP	replicative senescence	1	0.506476	0.211003
BP	GABAergic neuron differentiation	1	0.506476	0.211003
BP	negative regulation of receptor binding	1	0.506476	0.211003
BP	regulation of relaxation of muscle	1	0.506476	0.211003
BP	actin filament-based movement	4	0.509041	0.212417
BP	positive regulation of mononuclear cell proliferation	4	0.509041	0.212417
BP	positive regulation of establishment of protein localization	11	0.511345	0.213552
BP	acute-phase response	2	0.512009	0.21487
BP	mesenchymal cell proliferation	2	0.512009	0.21487
BP	antibiotic catabolic process	2	0.512009	0.21487
BP	alcohol catabolic process	2	0.512009	0.21487
BP	negative regulation of smooth muscle cell proliferation	2	0.512009	0.21487
BP	retina morphogenesis in camera-type eye	2	0.512009	0.21487
BP	positive regulation of leukocyte differentiation	4	0.51477	0.216203
BP	regulation of striated muscle contraction	3	0.516544	0.217299
BP	cell-substrate junction assembly	3	0.516544	0.217299
BP	pyridine-containing compound biosynthetic process	4	0.519564	0.220008
BP	prostate gland development	2	0.519564	0.221525
BP	positive regulation of Ras protein signal transduction	2	0.519564	0.221525
BP	negative regulation of lipid biosynthetic process	2	0.519564	0.221525
BP	regulation of substrate adhesion-dependent cell spreading	2	0.519564	0.221525
BP	negative regulation of leukocyte apoptotic process	2	0.519564	0.221525
BP	regulation of lymphocyte migration	2	0.519564	0.221525
BP	fatty acid derivative biosynthetic process	3	0.519564	0.222031
BP	negative regulation of kinase activity	7	0.519564	0.222371
BP	cellular response to radiation	5	0.519564	0.223203
BP	drug catabolic process	4	0.519564	0.223831
BP	cardiac left ventricle morphogenesis	1	0.519564	0.225262
BP	protein catabolic process in the vacuole	1	0.519564	0.225262
BP	adult heart development	1	0.519564	0.225262
BP	negative regulation of keratinocyte proliferation	1	0.519564	0.225262
BP	protein autoprocessing	1	0.519564	0.225262
BP	hemoglobin metabolic process	1	0.519564	0.225262
BP	chondroitin sulfate catabolic process	1	0.519564	0.225262
BP	myosin filament assembly	1	0.519564	0.225262
BP	regulation of pseudopodium assembly	1	0.519564	0.225262
BP	negative regulation of response to extracellular stimulus	1	0.519564	0.225262
BP	negative regulation of response to nutrient levels	1	0.519564	0.225262
BP	negative regulation of ATPase activity	1	0.519564	0.225262
BP	V(D)J recombination	1	0.519564	0.225262
BP	vitamin transmembrane transport	1	0.519564	0.225262
BP	neuronal stem cell division	1	0.519564	0.225262
BP	negative regulation of nitric oxide biosynthetic process	1	0.519564	0.225262
BP	T-helper 2 cell differentiation	1	0.519564	0.225262
BP	homocysteine metabolic process	1	0.519564	0.225262
BP	neuroblast division	1	0.519564	0.225262
BP	regulation of protein glycosylation	1	0.519564	0.225262
BP	positive regulation of metanephros development	1	0.519564	0.225262
BP	ammonium transmembrane transport	1	0.519564	0.225262
BP	regulation of chemokine secretion	1	0.519564	0.225262
BP	positive regulation of endoplasmic reticulum unfolded protein response	1	0.519564	0.225262
BP	sulfate transmembrane transport	1	0.519564	0.225262
BP	regulation of IRE1-mediated unfolded protein response	1	0.519564	0.225262
BP	negative regulation of nitric oxide metabolic process	1	0.519564	0.225262
BP	regulation of oxidoreductase activity	3	0.522258	0.226784
BP	positive regulation of plasma membrane bounded cell projection assembly	3	0.522258	0.226784
BP	neural precursor cell proliferation	4	0.523467	0.227672
BP	exocrine system development	2	0.523467	0.228196
BP	anion homeostasis	2	0.523467	0.228196
BP	regulation of vascular smooth muscle cell proliferation	2	0.523467	0.228196
BP	vascular smooth muscle cell proliferation	2	0.523467	0.228196
BP	regulation of cell morphogenesis involved in differentiation	7	0.527841	0.230282
BP	positive regulation of peptide hormone secretion	3	0.527978	0.231556
BP	rhythmic process	7	0.527978	0.23294
BP	positive regulation of myeloid leukocyte differentiation	2	0.527978	0.234881
BP	zymogen activation	2	0.527978	0.234881
BP	cellular extravasation	2	0.527978	0.234881
BP	negative regulation of chemotaxis	2	0.527978	0.234881
BP	bicellular tight junction assembly	2	0.527978	0.234881
BP	T cell migration	2	0.527978	0.234881
BP	negative regulation of epithelial cell migration	3	0.527978	0.236347
BP	receptor internalization	3	0.527978	0.236347
BP	regeneration	5	0.527978	0.236418
BP	hexose metabolic process	6	0.527978	0.237104
BP	response to lipopolysaccharide	8	0.527978	0.237803
BP	negative regulation of nervous system development	7	0.527978	0.238287
BP	regulation of peptidase activity	10	0.527978	0.238373
BP	trophectodermal cell differentiation	1	0.527978	0.239264
BP	lymphangiogenesis	1	0.527978	0.239264
BP	G-protein coupled receptor internalization	1	0.527978	0.239264
BP	T-helper cell lineage commitment	1	0.527978	0.239264
BP	germinal center formation	1	0.527978	0.239264
BP	positive regulation of T-helper 1 type immune response	1	0.527978	0.239264
BP	sulfate transport	1	0.527978	0.239264
BP	regulation of inositol phosphate biosynthetic process	1	0.527978	0.239264
BP	cell wall macromolecule catabolic process	1	0.527978	0.239264
BP	protein-chromophore linkage	1	0.527978	0.239264
BP	glycolipid catabolic process	1	0.527978	0.239264
BP	cell migration in hindbrain	1	0.527978	0.239264
BP	dentate gyrus development	1	0.527978	0.239264
BP	regulation of granulocyte differentiation	1	0.527978	0.239264
BP	myosin filament organization	1	0.527978	0.239264
BP	gonadotropin secretion	1	0.527978	0.239264
BP	positive regulation of interleukin-13 production	1	0.527978	0.239264
BP	primary alcohol catabolic process	1	0.527978	0.239264
BP	positive regulation of glycogen biosynthetic process	1	0.527978	0.239264
BP	positive regulation of insulin receptor signaling pathway	1	0.527978	0.239264
BP	dermatan sulfate proteoglycan biosynthetic process	1	0.527978	0.239264
BP	detection of temperature stimulus involved in sensory perception	1	0.527978	0.239264
BP	detection of temperature stimulus involved in sensory perception of pain	1	0.527978	0.239264
BP	negative regulation of cytosolic calcium ion concentration	1	0.527978	0.239264
BP	heart trabecula formation	1	0.527978	0.239264
BP	negative regulation of neuron projection regeneration	1	0.527978	0.239264
BP	otic vesicle development	1	0.527978	0.239264
BP	mitotic cell cycle arrest	1	0.527978	0.239264
BP	metanephric mesenchyme development	1	0.527978	0.239264
BP	nephron tubule epithelial cell differentiation	1	0.527978	0.239264
BP	embryonic skeletal joint development	1	0.527978	0.239264
BP	positive regulation of mitochondrial fission	1	0.527978	0.239264
BP	regulation of fibroblast apoptotic process	1	0.527978	0.239264
BP	regulation of corticosteroid hormone secretion	1	0.527978	0.239264
BP	positive regulation of leukocyte proliferation	4	0.527978	0.23929
BP	protein acylation	6	0.529293	0.240066
BP	regulation of actin cytoskeleton organization	8	0.529359	0.240275
BP	regulation of calcium ion transport into cytosol	3	0.529852	0.241154
BP	positive regulation of calcium ion transport into cytosol	2	0.529852	0.241577
BP	positive regulation of cellular carbohydrate metabolic process	2	0.529852	0.241577
BP	hexose catabolic process	2	0.529852	0.241577
BP	positive regulation of mitotic nuclear division	2	0.529852	0.241577
BP	regulation of alpha-beta T cell differentiation	2	0.529852	0.241577
BP	myeloid cell homeostasis	4	0.532607	0.243194
BP	regulation of G-protein coupled receptor protein signaling pathway	4	0.532607	0.243194
BP	regulation of cytokine biosynthetic process	3	0.535815	0.245978
BP	hormone-mediated signaling pathway	6	0.535815	0.246023
BP	female pregnancy	5	0.535815	0.246469
BP	cardiocyte differentiation	4	0.535815	0.247112
BP	regulation of T cell mediated immunity	2	0.535815	0.248281
BP	arachidonic acid metabolic process	2	0.535815	0.248281
BP	forebrain neuron differentiation	2	0.535815	0.248281
BP	positive regulation of chemokine production	2	0.535815	0.248281
BP	regulation of histone acetylation	2	0.535815	0.248281
BP	negative regulation of DNA binding	2	0.535815	0.248281
BP	negative regulation of striated muscle tissue development	2	0.535815	0.248281
BP	regulation of peptidyl-tyrosine phosphorylation	6	0.535815	0.249018
BP	cellular modified amino acid metabolic process	5	0.535815	0.249845
BP	oxidoreduction coenzyme metabolic process	5	0.535815	0.249845
BP	regulation of apoptotic signaling pathway	9	0.535815	0.250167
BP	regulation of ERBB signaling pathway	3	0.535815	0.250817
BP	negative regulation of angiogenesis	4	0.535815	0.251044
BP	fucose metabolic process	1	0.535815	0.253014
BP	N-acetylglucosamine metabolic process	1	0.535815	0.253014
BP	thyroid hormone generation	1	0.535815	0.253014
BP	polyamine metabolic process	1	0.535815	0.253014
BP	glutathione biosynthetic process	1	0.535815	0.253014
BP	stabilization of membrane potential	1	0.535815	0.253014
BP	pseudopodium assembly	1	0.535815	0.253014
BP	Cdc42 protein signal transduction	1	0.535815	0.253014
BP	corticosteroid hormone secretion	1	0.535815	0.253014
BP	peptidyl-threonine dephosphorylation	1	0.535815	0.253014
BP	protein O-linked fucosylation	1	0.535815	0.253014
BP	CD4-positive, alpha-beta T cell lineage commitment	1	0.535815	0.253014
BP	regulation of interferon-gamma biosynthetic process	1	0.535815	0.253014
BP	ceramide catabolic process	1	0.535815	0.253014
BP	regulation of retinoic acid receptor signaling pathway	1	0.535815	0.253014
BP	lymph node development	1	0.535815	0.253014
BP	hair follicle maturation	1	0.535815	0.253014
BP	dermatan sulfate proteoglycan metabolic process	1	0.535815	0.253014
BP	sulfation	1	0.535815	0.253014
BP	venous blood vessel development	1	0.535815	0.253014
BP	heterochromatin organization	1	0.535815	0.253014
BP	positive regulation of glycogen metabolic process	1	0.535815	0.253014
BP	cellular response to nitric oxide	1	0.535815	0.253014
BP	response to epinephrine	1	0.535815	0.253014
BP	chemokine secretion	1	0.535815	0.253014
BP	neuron projection arborization	1	0.535815	0.253014
BP	positive regulation of lymphocyte chemotaxis	1	0.535815	0.253014
BP	positive regulation of endothelial cell apoptotic process	1	0.535815	0.253014
BP	negative regulation of anoikis	1	0.535815	0.253014
BP	intracellular receptor signaling pathway	7	0.538456	0.254562
BP	response to glucocorticoid	4	0.538456	0.254989
BP	negative regulation of muscle organ development	2	0.538456	0.254991
BP	regulation of kidney development	2	0.538456	0.254991
BP	glucose metabolic process	5	0.541144	0.256631
BP	response to glucose	5	0.541144	0.256631
BP	steroid hormone mediated signaling pathway	5	0.544878	0.260041
BP	pigmentation	3	0.544878	0.260537
BP	reactive oxygen species biosynthetic process	3	0.544878	0.260537
BP	neuroepithelial cell differentiation	2	0.544878	0.261705
BP	cell differentiation involved in kidney development	2	0.544878	0.261705
BP	negative regulation of muscle tissue development	2	0.544878	0.261705
BP	negative regulation of reproductive process	2	0.544878	0.261705
BP	negative regulation of blood vessel morphogenesis	4	0.544878	0.262917
BP	osteoblast development	1	0.544878	0.266516
BP	regulation of gene expression by genetic imprinting	1	0.544878	0.266516
BP	indolalkylamine metabolic process	1	0.544878	0.266516
BP	Notch receptor processing	1	0.544878	0.266516
BP	serine family amino acid biosynthetic process	1	0.544878	0.266516
BP	negative regulation of lipid storage	1	0.544878	0.266516
BP	response to insecticide	1	0.544878	0.266516
BP	striatum development	1	0.544878	0.266516
BP	pseudopodium organization	1	0.544878	0.266516
BP	response to follicle-stimulating hormone	1	0.544878	0.266516
BP	wound healing, spreading of epidermal cells	1	0.544878	0.266516
BP	cellular response to sterol	1	0.544878	0.266516
BP	post-anal tail morphogenesis	1	0.544878	0.266516
BP	interferon-gamma biosynthetic process	1	0.544878	0.266516
BP	melanin biosynthetic process	1	0.544878	0.266516
BP	positive regulation by host of viral transcription	1	0.544878	0.266516
BP	negative regulation of cAMP-mediated signaling	1	0.544878	0.266516
BP	cell wall macromolecule metabolic process	1	0.544878	0.266516
BP	negative regulation of epidermis development	1	0.544878	0.266516
BP	short-chain fatty acid metabolic process	1	0.544878	0.266516
BP	positive regulation of mRNA splicing, via spliceosome	1	0.544878	0.266516
BP	relaxation of cardiac muscle	1	0.544878	0.266516
BP	morphogenesis of an epithelial bud	1	0.544878	0.266516
BP	interleukin-6-mediated signaling pathway	1	0.544878	0.266516
BP	cellular response to prostaglandin E stimulus	1	0.544878	0.266516
BP	cell wall organization or biogenesis	1	0.544878	0.266516
BP	positive regulation of transforming growth factor beta production	1	0.544878	0.266516
BP	interferon-gamma secretion	1	0.544878	0.266516
BP	positive regulation of monocyte chemotaxis	1	0.544878	0.266516
BP	negative regulation of kidney development	1	0.544878	0.266516
BP	extracellular regulation of signal transduction	1	0.544878	0.266516
BP	extracellular negative regulation of signal transduction	1	0.544878	0.266516
BP	positive regulation of extrinsic apoptotic signaling pathway via death domain receptors	1	0.544878	0.266516
BP	regulation of leukocyte adhesion to vascular endothelial cell	1	0.544878	0.266516
BP	positive regulation of stem cell differentiation	1	0.544878	0.266516
BP	sensory perception of sound	4	0.544878	0.266898
BP	carbohydrate transport	4	0.544878	0.266898
BP	regulation of epithelial cell differentiation	4	0.544878	0.266898
BP	production of molecular mediator involved in inflammatory response	2	0.546095	0.268419
BP	regulation of immunoglobulin production	2	0.546095	0.268419
BP	response to zinc ion	2	0.546095	0.268419
BP	regulation of nitric oxide biosynthetic process	2	0.546095	0.268419
BP	positive regulation of small GTPase mediated signal transduction	2	0.546095	0.268419
BP	regulation of extent of cell growth	3	0.54923	0.270304
BP	response to hexose	5	0.54923	0.270333
BP	glycoprotein biosynthetic process	8	0.552729	0.273163
BP	cell-cell adhesion via plasma-membrane adhesion molecules	6	0.552729	0.273332
BP	regulation of T cell proliferation	4	0.552729	0.274894
BP	negative regulation of endothelial cell proliferation	2	0.552729	0.275133
BP	positive regulation of actin filament bundle assembly	2	0.552729	0.275133
BP	plasma lipoprotein particle clearance	2	0.552729	0.275133
BP	bone resorption	2	0.552729	0.275133
BP	cellular response to alcohol	2	0.552729	0.275133
BP	positive regulation of reproductive process	2	0.552729	0.275133
BP	cyclic purine nucleotide metabolic process	3	0.552729	0.275204
BP	regulation of systemic arterial blood pressure by circulatory renin-angiotensin	1	0.552729	0.279775
BP	lymphoid progenitor cell differentiation	1	0.552729	0.279775
BP	alpha-beta T cell lineage commitment	1	0.552729	0.279775
BP	melanin metabolic process	1	0.552729	0.279775
BP	glycosylceramide metabolic process	1	0.552729	0.279775
BP	cellular sodium ion homeostasis	1	0.552729	0.279775
BP	response to UV-B	1	0.552729	0.279775
BP	negative regulation of platelet activation	1	0.552729	0.279775
BP	glycoside metabolic process	1	0.552729	0.279775
BP	nonribosomal peptide biosynthetic process	1	0.552729	0.279775
BP	maintenance of gastrointestinal epithelium	1	0.552729	0.279775
BP	positive regulation of phosphoprotein phosphatase activity	1	0.552729	0.279775
BP	negative regulation of chemokine production	1	0.552729	0.279775
BP	regulation of mammary gland epithelial cell proliferation	1	0.552729	0.279775
BP	lymph vessel morphogenesis	1	0.552729	0.279775
BP	cytoplasmic sequestering of transcription factor	1	0.552729	0.279775
BP	type B pancreatic cell proliferation	1	0.552729	0.279775
BP	fibroblast apoptotic process	1	0.552729	0.279775
BP	positive regulation of T-helper cell differentiation	1	0.552729	0.279775
BP	positive regulation of glycolytic process	1	0.552729	0.279775
BP	negative regulation of T cell receptor signaling pathway	1	0.552729	0.279775
BP	camera-type eye photoreceptor cell differentiation	1	0.552729	0.279775
BP	renal filtration cell differentiation	1	0.552729	0.279775
BP	cellular response to gonadotropin stimulus	1	0.552729	0.279775
BP	cellular response to low-density lipoprotein particle stimulus	1	0.552729	0.279775
BP	glomerular visceral epithelial cell differentiation	1	0.552729	0.279775
BP	modified amino acid transport	1	0.552729	0.279775
BP	positive regulation of extracellular matrix organization	1	0.552729	0.279775
BP	negative regulation of blood vessel endothelial cell proliferation involved in sprouting angiogenesis	1	0.552729	0.279775
BP	regulation of epithelial cell differentiation involved in kidney development	1	0.552729	0.279775
BP	regulation of steroid hormone secretion	1	0.552729	0.279775
BP	cyclic nucleotide biosynthetic process	3	0.552729	0.280112
BP	leukocyte apoptotic process	3	0.552729	0.280112
BP	negative regulation of hydrolase activity	10	0.553174	0.280591
BP	cellular response to hypoxia	5	0.553174	0.280712
BP	response to activity	2	0.553187	0.281844
BP	regulation of monooxygenase activity	2	0.553187	0.281844
BP	tetrapyrrole metabolic process	2	0.553187	0.281844
BP	polyol biosynthetic process	2	0.553187	0.281844
BP	filopodium assembly	2	0.553187	0.281844
BP	regulation of peptidyl-lysine acetylation	2	0.553187	0.281844
BP	blood vessel endothelial cell migration	4	0.554578	0.282929
BP	anatomical structure maturation	4	0.554578	0.282929
BP	response to molecule of bacterial origin	8	0.555394	0.283533
BP	adenylate cyclase-activating G-protein coupled receptor signaling pathway	3	0.556844	0.285028
BP	intrinsic apoptotic signaling pathway in response to DNA damage	3	0.556844	0.285028
BP	cAMP metabolic process	3	0.556844	0.285028
BP	alpha-amino acid catabolic process	3	0.556844	0.285028
BP	response to ionizing radiation	4	0.557614	0.28696
BP	response to monosaccharide	5	0.557614	0.287676
BP	regulation of leukocyte cell-cell adhesion	7	0.557614	0.28803
BP	peptide cross-linking	2	0.557614	0.28855
BP	muscle fiber development	2	0.557614	0.28855
BP	maternal process involved in female pregnancy	2	0.557614	0.28855
BP	cell aging	3	0.557614	0.289952
BP	ERBB signaling pathway	4	0.557614	0.290999
BP	regulation of JAK-STAT cascade	4	0.557614	0.290999
BP	negative regulation of vasculature development	4	0.557614	0.290999
BP	axon guidance	6	0.557614	0.291929
BP	organ induction	1	0.557614	0.292794
BP	chronic inflammatory response	1	0.557614	0.292794
BP	water transport	1	0.557614	0.292794
BP	pinocytosis	1	0.557614	0.292794
BP	regulation of cardiac muscle contraction by regulation of the release of sequestered calcium ion	1	0.557614	0.292794
BP	detection of temperature stimulus	1	0.557614	0.292794
BP	signal transduction involved in regulation of gene expression	1	0.557614	0.292794
BP	positive regulation of chondrocyte differentiation	1	0.557614	0.292794
BP	negative regulation of interleukin-2 production	1	0.557614	0.292794
BP	middle ear morphogenesis	1	0.557614	0.292794
BP	thymic T cell selection	1	0.557614	0.292794
BP	regulation of circadian sleep/wake cycle, sleep	1	0.557614	0.292794
BP	embryonic digestive tract morphogenesis	1	0.557614	0.292794
BP	positive regulation of coenzyme metabolic process	1	0.557614	0.292794
BP	regulation of mitochondrial depolarization	1	0.557614	0.292794
BP	negative regulation of cardiac muscle cell proliferation	1	0.557614	0.292794
BP	trachea development	1	0.557614	0.292794
BP	negative regulation of biomineral tissue development	1	0.557614	0.292794
BP	histone H3-K27 methylation	1	0.557614	0.292794
BP	vocalization behavior	1	0.557614	0.292794
BP	kidney mesenchyme development	1	0.557614	0.292794
BP	nephron tubule formation	1	0.557614	0.292794
BP	glomerular epithelial cell differentiation	1	0.557614	0.292794
BP	T-helper 17 cell differentiation	1	0.557614	0.292794
BP	amino acid import across plasma membrane	1	0.557614	0.292794
BP	cellular response to reactive nitrogen species	1	0.557614	0.292794
BP	negative regulation of endoplasmic reticulum stress-induced intrinsic apoptotic signaling pathway	1	0.557614	0.292794
BP	regulation of mesoderm development	1	0.557614	0.292794
BP	negative regulation of transferase activity	7	0.55868	0.29371
BP	cellular response to insulin stimulus	5	0.55868	0.294671
BP	cytokine biosynthetic process	3	0.55868	0.294882
BP	neuron projection extension	4	0.55868	0.295046
BP	proteoglycan biosynthetic process	2	0.55868	0.295248
BP	apical junction assembly	2	0.55868	0.295248
BP	histone H3 acetylation	2	0.55868	0.295248
BP	cellular response to glucocorticoid stimulus	2	0.55868	0.295248
BP	regulation of stem cell proliferation	2	0.55868	0.295248
BP	cardiac muscle cell contraction	2	0.55868	0.295248
BP	neuron projection guidance	6	0.563878	0.298187
BP	regulation of STAT cascade	4	0.565214	0.299101
BP	muscle cell differentiation	8	0.565214	0.299276
BP	cytokine metabolic process	3	0.565873	0.299817
BP	tissue regeneration	2	0.569147	0.301937
BP	cardiac muscle cell proliferation	2	0.569147	0.301937
BP	regulation of lymphocyte differentiation	4	0.569823	0.303162
BP	cellular response to decreased oxygen levels	5	0.569823	0.305216
BP	arginine metabolic process	1	0.569823	0.30558
BP	inflammatory cell apoptotic process	1	0.569823	0.30558
BP	vascular smooth muscle contraction	1	0.569823	0.30558
BP	leukotriene biosynthetic process	1	0.569823	0.30558
BP	peroxisome proliferator activated receptor signaling pathway	1	0.569823	0.30558
BP	response to interferon-alpha	1	0.569823	0.30558
BP	thyroid hormone metabolic process	1	0.569823	0.30558
BP	CD4-positive or CD8-positive, alpha-beta T cell lineage commitment	1	0.569823	0.30558
BP	polyol catabolic process	1	0.569823	0.30558
BP	negative regulation of axon extension involved in axon guidance	1	0.569823	0.30558
BP	positive regulation of nitric-oxide synthase activity	1	0.569823	0.30558
BP	chaperone-mediated protein complex assembly	1	0.569823	0.30558
BP	regulation of hair follicle development	1	0.569823	0.30558
BP	mesenchymal to epithelial transition	1	0.569823	0.30558
BP	negative regulation of vascular smooth muscle cell proliferation	1	0.569823	0.30558
BP	divalent metal ion transport	10	0.570218	0.305985
BP	response to insulin	6	0.572544	0.307621
BP	regulation of leukocyte differentiation	6	0.572544	0.307621
BP	monosaccharide catabolic process	2	0.573549	0.308615
BP	negative regulation of calcium ion transport	2	0.573549	0.308615
BP	establishment or maintenance of cell polarity	5	0.573549	0.308745
BP	camera-type eye morphogenesis	3	0.574961	0.309699
BP	regulation of intrinsic apoptotic signaling pathway	4	0.577573	0.311302
BP	developmental cell growth	5	0.578248	0.312279
BP	regulation of interleukin-8 production	2	0.578248	0.315281
BP	negative regulation of hormone secretion	2	0.578248	0.315281
BP	positive regulation of nuclear division	2	0.578248	0.315281
BP	negative regulation of ERK1 and ERK2 cascade	2	0.578248	0.315281
BP	negative regulation of phosphorylation	10	0.578248	0.315359
BP	divalent inorganic cation transport	10	0.578248	0.315359
BP	acute inflammatory response to antigenic stimulus	1	0.578248	0.318135
BP	atrioventricular valve morphogenesis	1	0.578248	0.318135
BP	negative regulation of tumor necrosis factor-mediated signaling pathway	1	0.578248	0.318135
BP	phasic smooth muscle contraction	1	0.578248	0.318135
BP	response to muscle activity	1	0.578248	0.318135
BP	norepinephrine transport	1	0.578248	0.318135
BP	positive regulation of nucleotide catabolic process	1	0.578248	0.318135
BP	regulation of heterotypic cell-cell adhesion	1	0.578248	0.318135
BP	embryonic hemopoiesis	1	0.578248	0.318135
BP	cellular response to platelet-derived growth factor stimulus	1	0.578248	0.318135
BP	PERK-mediated unfolded protein response	1	0.578248	0.318135
BP	regulation of circadian sleep/wake cycle	1	0.578248	0.318135
BP	tongue development	1	0.578248	0.318135
BP	tetrahydrofolate metabolic process	1	0.578248	0.318135
BP	sympathetic nervous system development	1	0.578248	0.318135
BP	regulation of collateral sprouting	1	0.578248	0.318135
BP	sensory perception of temperature stimulus	1	0.578248	0.318135
BP	definitive hemopoiesis	1	0.578248	0.318135
BP	labyrinthine layer morphogenesis	1	0.578248	0.318135
BP	left/right pattern formation	1	0.578248	0.318135
BP	positive regulation of mononuclear cell migration	1	0.578248	0.318135
BP	T-helper 17 type immune response	1	0.578248	0.318135
BP	positive regulation of alcohol biosynthetic process	1	0.578248	0.318135
BP	regulation of establishment of cell polarity	1	0.578248	0.318135
BP	regulation of endothelial cell chemotaxis	1	0.578248	0.318135
BP	regulation of glucose import in response to insulin stimulus	1	0.578248	0.318135
BP	cellular response to external stimulus	7	0.579826	0.31956
BP	transition metal ion transport	3	0.579826	0.319592
BP	columnar/cuboidal epithelial cell differentiation	3	0.579826	0.319592
BP	calcium ion transport	9	0.581211	0.320639
BP	excretion	2	0.581211	0.321932
BP	forebrain generation of neurons	2	0.581211	0.321932
BP	positive regulation of epithelial cell differentiation	2	0.581211	0.321932
BP	macrophage activation	2	0.581211	0.321932
BP	regulation of glucose import	2	0.581211	0.321932
BP	cellular response to corticosteroid stimulus	2	0.581211	0.321932
BP	positive regulation of calcium ion transmembrane transport	2	0.581211	0.321932
BP	glycoprotein metabolic process	9	0.583047	0.323146
BP	lymphocyte proliferation	6	0.583054	0.323456
BP	axon extension	3	0.583054	0.32454
BP	cellular response to abiotic stimulus	7	0.583054	0.325361
BP	cellular response to environmental stimulus	7	0.583054	0.325361
BP	skin development	9	0.583054	0.328173
BP	regulation of cytokine production involved in immune response	2	0.583054	0.328567
BP	cellular iron ion homeostasis	2	0.583054	0.328567
BP	respiratory gaseous exchange	2	0.583054	0.328567
BP	sensory perception of taste	2	0.583054	0.328567
BP	response to nutrient levels	10	0.583054	0.329541
BP	mononuclear cell proliferation	6	0.583054	0.329824
BP	regulation of T-helper 1 type immune response	1	0.583054	0.330463
BP	response to lithium ion	1	0.583054	0.330463
BP	response to acidic pH	1	0.583054	0.330463
BP	hypothalamus development	1	0.583054	0.330463
BP	male genitalia development	1	0.583054	0.330463
BP	regulation of cGMP biosynthetic process	1	0.583054	0.330463
BP	positive regulation of interleukin-4 production	1	0.583054	0.330463
BP	response to platelet-derived growth factor	1	0.583054	0.330463
BP	amino acid import	1	0.583054	0.330463
BP	intermediate filament organization	1	0.583054	0.330463
BP	animal organ maturation	1	0.583054	0.330463
BP	negative regulation of antigen receptor-mediated signaling pathway	1	0.583054	0.330463
BP	positive regulation of cofactor metabolic process	1	0.583054	0.330463
BP	mitochondrial depolarization	1	0.583054	0.330463
BP	lung epithelial cell differentiation	1	0.583054	0.330463
BP	positive regulation of mesonephros development	1	0.583054	0.330463
BP	response to cholesterol	1	0.583054	0.330463
BP	cellular response to zinc ion	1	0.583054	0.330463
BP	cellular response to prostaglandin stimulus	1	0.583054	0.330463
BP	cellular response to pH	1	0.583054	0.330463
BP	glomerular epithelium development	1	0.583054	0.330463
BP	regulation of monocyte chemotaxis	1	0.583054	0.330463
BP	neuronal stem cell population maintenance	1	0.583054	0.330463
BP	regulation of receptor binding	1	0.583054	0.330463
BP	regulation of lymphocyte chemotaxis	1	0.583054	0.330463
BP	negative regulation of axon guidance	1	0.583054	0.330463
BP	in utero embryonic development	7	0.583899	0.331178
BP	lymphocyte activation involved in immune response	4	0.583899	0.331734
BP	vascular process in circulatory system	4	0.583899	0.331734
BP	sensory perception of mechanical stimulus	4	0.583899	0.331734
BP	phospholipase C-activating G-protein coupled receptor signaling pathway	3	0.588305	0.334436
BP	regulation of behavior	2	0.589269	0.335184
BP	regulation of production of molecular mediator of immune response	3	0.591045	0.339383
BP	cellular transition metal ion homeostasis	3	0.591045	0.339383
BP	cardiac muscle cell differentiation	3	0.591045	0.339383
BP	skeletal muscle tissue development	4	0.591045	0.339929
BP	regulation of cysteine-type endopeptidase activity involved in apoptotic process	5	0.591045	0.34072
BP	androgen receptor signaling pathway	2	0.591045	0.341782
BP	inositol phosphate metabolic process	2	0.591045	0.341782
BP	positive regulation of synapse assembly	2	0.591045	0.341782
BP	glutamine metabolic process	1	0.591045	0.342569
BP	T cell chemotaxis	1	0.591045	0.342569
BP	subpallium development	1	0.591045	0.342569
BP	central nervous system projection neuron axonogenesis	1	0.591045	0.342569
BP	positive regulation of cAMP biosynthetic process	1	0.591045	0.342569
BP	melanosome transport	1	0.591045	0.342569
BP	smooth muscle cell apoptotic process	1	0.591045	0.342569
BP	regulation of smooth muscle cell apoptotic process	1	0.591045	0.342569
BP	regulation of excretion	1	0.591045	0.342569
BP	glucose import in response to insulin stimulus	1	0.591045	0.342569
BP	positive regulation of epidermal cell differentiation	1	0.591045	0.342569
BP	positive regulation of calcium ion-dependent exocytosis	1	0.591045	0.342569
BP	circadian sleep/wake cycle, sleep	1	0.591045	0.342569
BP	response to lipoprotein particle	1	0.591045	0.342569
BP	lung cell differentiation	1	0.591045	0.342569
BP	heart formation	1	0.591045	0.342569
BP	zinc ion transmembrane transport	1	0.591045	0.342569
BP	regulation of metanephros development	1	0.591045	0.342569
BP	regulation of mitochondrial fission	1	0.591045	0.342569
BP	positive regulation of pri-miRNA transcription by RNA polymerase II	1	0.591045	0.342569
BP	regulation of bone development	1	0.591045	0.342569
BP	regulation of anoikis	1	0.591045	0.342569
BP	positive regulation of transcription regulatory region DNA binding	1	0.591045	0.342569
BP	stress-activated MAPK cascade	6	0.591045	0.342606
BP	nucleotide catabolic process	4	0.597099	0.348131
BP	positive regulation of nucleotide biosynthetic process	2	0.597099	0.348359
BP	positive regulation of JUN kinase activity	2	0.597099	0.348359
BP	response to axon injury	2	0.597099	0.348359
BP	positive regulation of purine nucleotide biosynthetic process	2	0.597099	0.348359
BP	regulation of protein acetylation	2	0.597099	0.348359
BP	negative regulation of protein phosphorylation	9	0.597099	0.348421
BP	regulation of T cell activation	7	0.597099	0.348718
BP	positive regulation of MAP kinase activity	6	0.597099	0.349017
BP	regulation of DNA binding	3	0.597099	0.349267
BP	positive regulation of small molecule metabolic process	4	0.597099	0.352233
BP	cellular amino acid catabolic process	3	0.597099	0.354204
BP	oocyte maturation	1	0.597099	0.354457
BP	lymph vessel development	1	0.597099	0.354457
BP	positive regulation of receptor internalization	1	0.597099	0.354457
BP	renal system process involved in regulation of systemic arterial blood pressure	1	0.597099	0.354457
BP	atrioventricular valve development	1	0.597099	0.354457
BP	purine nucleobase metabolic process	1	0.597099	0.354457
BP	serotonin receptor signaling pathway	1	0.597099	0.354457
BP	regulation of cardiac muscle contraction by calcium ion signaling	1	0.597099	0.354457
BP	ovulation	1	0.597099	0.354457
BP	regulation of response to extracellular stimulus	1	0.597099	0.354457
BP	regulation of response to nutrient levels	1	0.597099	0.354457
BP	establishment of melanosome localization	1	0.597099	0.354457
BP	positive regulation of protein oligomerization	1	0.597099	0.354457
BP	regulation of establishment or maintenance of cell polarity	1	0.597099	0.354457
BP	response to immobilization stress	1	0.597099	0.354457
BP	indole-containing compound metabolic process	1	0.597099	0.354457
BP	retinoic acid metabolic process	1	0.597099	0.354457
BP	positive regulation of CD4-positive, alpha-beta T cell differentiation	1	0.597099	0.354457
BP	regulation of insulin-like growth factor receptor signaling pathway	1	0.597099	0.354457
BP	somatic stem cell division	1	0.597099	0.354457
BP	leukocyte tethering or rolling	1	0.597099	0.354457
BP	cytoplasmic sequestering of protein	1	0.597099	0.354457
BP	pigment granule transport	1	0.597099	0.354457
BP	regulation of protein exit from endoplasmic reticulum	1	0.597099	0.354457
BP	G-protein coupled serotonin receptor signaling pathway	1	0.597099	0.354457
BP	negative regulation of plasma membrane bounded cell projection assembly	1	0.597099	0.354457
BP	glucosamine-containing compound metabolic process	1	0.597099	0.354457
BP	negative regulation of anion transport	1	0.597099	0.354457
BP	cellular response to retinoic acid	2	0.597099	0.354914
BP	carbohydrate derivative transport	2	0.597099	0.354914
BP	hormone metabolic process	5	0.597099	0.355021
BP	multi-multicellular organism process	5	0.597099	0.355021
BP	small molecule catabolic process	9	0.602518	0.358615
BP	striated muscle cell differentiation	6	0.602518	0.358652
BP	interleukin-8 production	2	0.60577	0.361446
BP	regulation of cellular response to insulin stimulus	2	0.60577	0.361446
BP	cellular response to oxygen levels	5	0.60577	0.362182
BP	regulation of adaptive immune response based on somatic recombination of immune receptors built from immunoglobulin superfamily domains	3	0.60577	0.364063
BP	response to carbohydrate	5	0.60577	0.365764
BP	regulation of systemic arterial blood pressure by renin-angiotensin	1	0.60577	0.366131
BP	NADH regeneration	1	0.60577	0.366131
BP	nitric oxide mediated signal transduction	1	0.60577	0.366131
BP	epithelial structure maintenance	1	0.60577	0.366131
BP	circadian sleep/wake cycle process	1	0.60577	0.366131
BP	sphingolipid catabolic process	1	0.60577	0.366131
BP	purine ribonucleoside bisphosphate metabolic process	1	0.60577	0.366131
BP	3'-phosphoadenosine 5'-phosphosulfate metabolic process	1	0.60577	0.366131
BP	regulation of histone H3-K4 methylation	1	0.60577	0.366131
BP	establishment of pigment granule localization	1	0.60577	0.366131
BP	negative regulation of cardiac muscle tissue growth	1	0.60577	0.366131
BP	monovalent inorganic anion homeostasis	1	0.60577	0.366131
BP	pharyngeal system development	1	0.60577	0.366131
BP	innervation	1	0.60577	0.366131
BP	negative regulation of heart growth	1	0.60577	0.366131
[truncated: 1,669 more rows]
